# Supplementary material
Source: ML conference proceedings conference paper supplement (https://openreview.net/forum?id=8YN62t19AW)
Supplement: supplementary_material [file attachment]

---

# A Unified Discretization Framework for Differential Equation Approach with Lyapunov Arguments for Convex Optimization

---

Anonymous Author(s)

Affiliation

Address

email

## Abstract

1 The differential equation (DE) approach for convex optimization, which relates  
2 optimization methods to specific continuous DEs with rate-revealing Lyapunov  
3 functionals, has gained increasing interest since the seminal paper by Su–Boyd–  
4 Candès (2014). However, the approach still lacks a crucial component to make  
5 it truly useful: there is no general, consistent way to transition back to discrete  
6 optimization methods. Consequently, even if we derive insights from continuous  
7 DEs, we still need to perform individualized and tedious calculations for the  
8 analysis of each method. This paper aims to bridge this gap by introducing a new  
9 concept called “weak discrete gradient” (wDG), which consolidates the conditions  
10 required for discrete versions of gradients in the DE approach arguments. We then  
11 define abstract optimization methods using wDG and provide abstract convergence  
12 theories that parallel those in continuous DEs. We demonstrate that many typical  
13 optimization methods and their convergence rates can be derived as special cases  
14 of this abstract theory. The proposed unified discretization framework for the  
15 differential equation approach to convex optimization provides an easy environment  
16 for developing new optimization methods and achieving competitive convergence  
17 rates with state-of-the-art methods, such as Nesterov’s accelerated gradient.

## 18 1 Introduction

19 In this paper, we consider unconstrained convex optimization problems:

$$\min_{x \in \mathbb{R}^d} f(x). \quad (1)$$

20 Various optimization methods, such as standard gradient descent and Nesterov’s accelerated gradient  
21 methods (Nesterov, 1983), are known for these problems. The convergence rates of these methods  
22 have been intensively investigated based on the classes of objective functions ( $L$ -smooth and/or  $\mu$ -  
23 strong convex). We focus on the convergence rate of function values  $f(x^{(k)}) - f^*$ , while the rates for  
24  $\|\nabla f(x^{(k)})\|$  or  $\|x^{(k)} - x^*\|$  have also been discussed. Topics particularly relevant to this study include  
25 the lower bound of convergence rates for first-order methods (see Remark 4.3 for the relationship  
26 between our framework and first-order methods) for convex and strongly convex functions:  $O(1/k^2)$   
27 for  $L$ -smooth and convex functions (cf. Nesterov (2018)) and  $O\left((1 - \sqrt{\mu/L})^{2k}\right)$  for  $L$ -smooth and  
28  $\mu$ -strongly convex functions (Drori and Taylor, 2022). These lower bounds are tight, as they are  
29 achieved by some optimization methods, such as Nesterov (1983) for convex functions and Van Scoy  
30 et al. (2018); Taylor and Drori (2022a) for strongly convex functions. In these studies, the discussion  
31 is typically conducted for each method, utilizing various techniques accumulated in the optimization  
32 research field.

Whereas, it has long been known that some optimization methods can be related to continuous differential equations (DEs). Early works on this aspect include the following: the continuous gradient flow  $\dot{x} = -\nabla f(x)$  as a continuous optimization method was discussed in Bruck (1975). Similar arguments were later applied to second-order differential equations (Alvarez, 2000; Alvarez et al., 2002; Cabot et al., 2009). An important milestone in this direction was Su et al. (2014), where it was shown that Nesterov’s famous accelerated gradient method (Nesterov, 1983) could be related to a second-order system with a convergence rate-revealing “Lyapunov functional.” The insights gained from this relationship have been useful in understanding the behavior of the Nesterov method and in considering its new variants. This success has followed by many studies, including Wilson (2018); Wilson et al. (2021). The advantage of the DEs with Lyapunov functional approach (which we simply call the “DE approach” hereafter) is that the continuous DEs are generally more intuitive, and convergence rate estimates are quite straightforward thanks to the Lyapunov functionals. However, the DE approach still lacks one important component; although we can draw useful insights from continuous DEs, there is no known general way to translate them into a discrete setting. Consequently, we still need to perform complex discrete arguments for each method. This limitation was already acknowledged in Su et al. (2014): “... The translation, however, involves parameter tuning and tedious calculations. This is the reason why a general theory mapping properties of ODEs into corresponding properties for discrete updates would be a welcome advance.”

In this paper we attempt to provide this missing piece by incorporating the concept of “discrete gradients” (DGs) from numerical analysis, which is used to replicate some properties of continuous DEs in discrete settings. We demonstrate that a relaxed concept of DG, which we call “weak discrete gradient” (wDG), can serve a similar purpose in the optimization context. More precisely, we show that for known DEs in the DE approach, if we define abstract optimization methods using wDGs analogously to the DEs, their abstract convergence theories can be obtained by following the continuous arguments and replacing gradients with wDGs. The tedious parts of the case-specific discrete arguments are consolidated in the definition of wDG, which simplifies the overall arguments: *we can now consider “simple continuous DE arguments” and “case-specific discrete discussions summarized in wDG” separately.* We demonstrate that many typical existing optimization methods and their rate estimates, previously done separately for each method, can be recovered as special cases of the abstract methods/theories, providing a simpler view of them. Any untested combination of a known DE and wDG presents an obvious new method and its rate, further expanding the potential for innovation in the optimization field. Creating a new wDG leads to a series of optimization methods by applying it to known DEs. One simply needs to verify if the wDG satisfies the conditions for wDG (Theorem 4.2) and reveal the constants of the wDG. If, in the future, a new DE with a rate-revealing Lyapunov functional is discovered, it should be possible to achieve similar results. We suggest first defining an abstract wDG method analogous to the DE and then examining whether the continuous theory can be translated to a discrete setting, as demonstrated in this paper.

The aforementioned paper (Su et al., 2014) concludes in the following way (continued from the previous quote) “Indeed, this would allow researchers to only study the simpler and more user-friendly ODEs.” Although there is still room for minor adjustments (see the discussion on limitations below), we believe the wDG framework substantially reduces the complexity of discussions in discrete methods, allowing researchers to focus on more accessible and intuitive aspects of optimization.

We consider the problems (1) on the  $d$ -dimensional Euclidean space  $\mathbb{R}^d$  ( $d$  is a positive integer) with the standard inner product  $\langle \cdot, \cdot \rangle$  and the induced norm  $\|\cdot\|$ , where  $f: \mathbb{R}^d \rightarrow \mathbb{R}$  represents a differentiable convex objective function. We assume the existence of the optimal value  $f^*$  and the optimal solution  $x^*$ . In the following discussion, we use the inequality

$$\frac{\mu}{2} \|y - x\|^2 \leq f(y) - f(x) - \langle \nabla f(x), y - x \rangle, \quad (2)$$

which holds for any  $x, y \in \mathbb{R}^d$  when  $f$  is  $\mu$ -strongly convex and differentiable.

**Remark 1.1.** Although the scope of this paper is limited due to the restriction of space, the framework can be naturally extended to more general cases. Extension to the objective functions satisfying the PL condition is provided in Appendix H. The framework can be extended to constrained optimizations by the DE approach for mirror descent methods (cf. Krichene et al. (2015); Wilson et al. (2021)), which the authors have already confirmed. Stochastic methods such as the stochastic gradient descent can be handled by considering random compositions of wDGs, which is left as our future work.

## 86 2 Short summary of the differential equation approach

87 Let us first consider the gradient flow:

$$\dot{x} = -\nabla f(x), \quad x(0) = x_0 \in \mathbb{R}^d. \quad (3)$$

88 It is easy to see that

$$\frac{d}{dt}f(x(t)) = \langle \nabla f(x(t)), \dot{x}(t) \rangle = -\|\nabla f(x(t))\|^2 \leq 0. \quad (4)$$

89 This means the flow can be regarded as a continuous optimization method. Notice that the proof is  
90 quite simple, once we admit the *chain rule of differentiation*, and the *form of the flow* itself (3); this  
91 will be quite important in the subsequent discussion.

92 Despite its simplicity, the convergence rate varies depending on the class of objective functions.  
93 Below we show some known results. The following rates are proven using the so-called Lyapunov  
94 argument, which introduces a “Lyapunov functional” that explicitly contains the convergence rate.  
95 The proof is left to Appendix B (we only note here that, in addition to the two key tools the chain rule  
96 and the form of the flow we need the *convexity inequality* (2) to complete the proof.)

97 **Theorem 2.1** (Convex case). *Suppose that  $f$  is convex. Let  $x: [0, \infty) \rightarrow \mathbb{R}^d$  be the solution of the*  
98 *gradient flow (3). Then the solution satisfies*

$$f(x(t)) - f^* \leq \frac{\|x_0 - x^*\|^2}{2t}.$$

99 **Theorem 2.2** (Strongly convex case). *Suppose that  $f$  is  $\mu$ -strongly convex. Let  $x: [0, \infty) \rightarrow \mathbb{R}^d$  be*  
100 *the solution of the gradient flow (3). Then the solution satisfies*

$$f(x(t)) - f^* \leq e^{-\mu t} \|x_0 - x^*\|^2.$$

101 An incomplete partial list of works using the Lyapunov approach includes, in addition to Su et al.  
102 (2014), Karimi and Vavasis (2016); Attouch et al. (2016); Attouch and Cabot (2017); Attouch et al.  
103 (2018); França et al. (2018); Defazio (2019); Shi et al. (2019); Wilson et al. (2021) (see also a  
104 comprehensive list in Suh et al. (2022)). A difficulty in this approach is that the Lyapunov functionals  
105 were found only heuristically. A remedy is provided in Suh et al. (2022); Du (2022), but its target is  
106 still limited.

107 Next, we consider DEs corresponding to accelerated gradient methods, including Nesterov’s method.  
108 As is well known, the forms of accelerated gradient methods differ depending on the class of objective  
109 functions, and consequently, the DEs to be considered also change. In this paper, we call them  
110 *accelerated gradient flows*.

111 When the objective functions are convex, we consider the following DE proposed in Wilson et al.  
112 (2021): let  $A: \mathbb{R}_{\geq 0} \rightarrow \mathbb{R}_{\geq 0}$  be a differentiable strictly monotonically increasing function with  
113  $A(0) = 0$ , and

$$\dot{x} = \frac{\dot{A}}{A}(v - x), \quad \dot{v} = -\frac{\dot{A}}{4}\nabla f(x), \quad (5)$$

114 with  $(x(0), v(0)) = (x_0, v_0) \in \mathbb{R}^d \times \mathbb{R}^d$ .

115 **Theorem 2.3** (Convex case (Wilson et al. (2021))). *Suppose that  $f$  is convex. Let  $(x, v): [0, \infty) \rightarrow$*   
116  *$\mathbb{R}^d \times \mathbb{R}^d$  be the solution of the DE (5). Then it satisfies*

$$f(x(t)) - f^* \leq \frac{2\|x_0 - x^*\|^2}{A(t)}.$$

117 **Remark 2.4.** If we set  $A(t) = t^2$ , this system coincides with a continuous limit DE of the accelerated  
118 gradient method for convex functions

$$\ddot{x} + \frac{3}{t}\dot{x} + \nabla f(x) = 0,$$

119 which is derived in Su et al. (2016).

120 Next, for strongly convex objective functions, let us consider the DE (again in Wilson et al. (2021)):

$$\dot{x} = \sqrt{\mu}(v - x), \quad \dot{v} = \sqrt{\mu}(x - v - \nabla f(x)/\mu) \quad (6)$$

121 with  $(x(0), v(0)) = (x_0, v_0) \in \mathbb{R}^d \times \mathbb{R}^d$ . (Note that this system coincides with the continuous  
122 limit ODE of the accelerated gradient method for strongly convex functions by Polyak (1964):  
123  $\ddot{x} + 2\sqrt{\mu}\dot{x} + \nabla f(x) = 0$ .)

124 **Theorem 2.5** (Strongly convex case (Wilson et al. (2021); Luo and Chen (2022))). *Suppose that  $f$  is  
125  $\mu$ -strongly convex. Let  $(x, v): [0, \infty) \rightarrow \mathbb{R}^d \times \mathbb{R}^d$  be the solution of (6). Then it satisfies*

$$f(x(t)) - f^* \leq e^{-\sqrt{\mu}t} \left( f(x_0) - f^* + \frac{\mu}{2} \|v_0 - x^*\|^2 \right).$$

### 126 3 Discrete gradient method for gradient flows (from numerical analysis)

127 The remaining issue is how we discretize the above DEs. In the optimization context, it was done  
128 separately in each study. One tempting strategy for a more systematic discretization is to import  
129 the concept of “DG,” which was invented in numerical analysis for designing structure-preserving  
130 numerical methods for gradient flows such as (3) (Gonzalez (1996); McLachlan et al. (1999)). Recall  
131 that the automatic decrease of objective function came from the two keys: (i) the chain rule, and (ii)  
132 the gradient flow structure. The DG method respects and tries to imitate them in discrete settings.

133 **Definition 3.1** (Discrete gradient (Gonzalez (1996); Quispel and Capel (1996))). A continuous map  
134  $\nabla_d f: \mathbb{R}^d \times \mathbb{R}^d \rightarrow \mathbb{R}^d$  is said to be *discrete gradient* of  $f$  if the following two conditions hold for all  
135  $x, y \in \mathbb{R}^d$ :

$$f(y) - f(x) = \langle \nabla_d f(y, x), y - x \rangle, \quad \nabla_d f(x, x) = \nabla f(x). \quad (7)$$

136 In the definition provided above, the second condition simply requires that  $\nabla_d f$  approximates  $\nabla f$ .  
137 On the contrary, the first condition, referred to as the *discrete chain rule*, is a critical requirement  
138 for the key (i). The discrete chain rule is a scalar equality constraint on the vector-valued function,  
139 and for any given  $f$ , there are generally infinitely many DGs. The following is a list of some popular  
140 choices of DGs. When it is necessary to differentiate them from wDGs, we call them *strict DGs*.

141 **Proposition 3.2** (Strict discrete gradients). *The following functions are strict DGs.*  
142 *Gonzalez discrete gradient  $\nabla_G f(y, x)$  (Gonzalez (1996)):*

$$\nabla f\left(\frac{y+x}{2}\right) + \frac{f(y) - f(x) - \langle \nabla f\left(\frac{y+x}{2}\right), y-x \rangle}{\|y-x\|^2} (y-x).$$

143 *Itoh–Abe discrete gradient  $\nabla_{IA} f(y, x)$  (Itoh and Abe (1988)):*

$$\begin{bmatrix} \frac{f(y_1, x_2, x_3, \dots, x_d) - f(x_1, x_2, x_3, \dots, x_d)}{y_1 - x_1} \\ \frac{f(y_1, y_2, x_3, \dots, x_d) - f(y_1, x_2, x_3, \dots, x_d)}{y_2 - x_2} \\ \vdots \\ \frac{f(y_1, y_2, y_3, \dots, y_d) - f(y_1, y_2, y_3, \dots, x_d)}{y_d - x_d} \end{bmatrix}.$$

144 *Average vector field (AVF)  $\nabla_{AVF} f(y, x)$  (Quispel and McLaren (2008)):*

$$\int_0^1 \nabla f(\tau y + (1-\tau)x) d\tau.$$

145 Suppose we have a DG for a given  $f$ . Then we can define a discrete scheme for the gradient flow (3):

$$\frac{x^{(k+1)} - x^{(k)}}{h} = -\nabla_d f(x^{(k+1)}, x^{(k)}), \quad x^{(0)} = x_0,$$

146 where the positive real number  $h$  is referred to as the step size, and  $x^{(k)} \simeq x(kh)$  is the numerical  
147 solution. The left-hand side approximates  $\dot{x}$  and is denoted by  $\delta^+ x^{(k)}$  hereafter. Note that the  
148 definition conforms to the key point (ii) mentioned earlier.

149 The scheme decreases  $f(x^{(k)})$  as expected:

$$\left( f(x^{(k+1)}) - f(x^{(k)}) \right) / h = \left\langle \nabla_d f(x^{(k+1)}, x^{(k)}), \delta^+ x^{(k)} \right\rangle = - \left\| \nabla_d f(x^{(k+1)}, x^{(k)}) \right\|^2 \leq 0.$$

150 In the first equality we used the discrete chain rule, and in the second, the form of the scheme itself.  
 151 Observe that the proof proceeds in the same manner as the continuous case (4). Due to the decreasing  
 152 property, the scheme should work as an optimization method. Additionally, the above argument does  
 153 not reply on the step size  $h$ , and it can be changed in every step (which will not destroy the decreasing  
 154 property).

155 In the numerical analysis community, the above approach has already been attempted for optimizations  
 156 (Grimm et al. (2017); Celledoni et al. (2018); Ehrhardt et al. (2018); Miyatake et al. (2018); Ringholm  
 157 et al. (2018); Benning et al. (2020); Riis et al. (2022)). Although they were successful on their own,  
 158 this does not immediately provide the missing piece we seek for the following reasons. First, the  
 159 DG framework does not include typical important optimization methods; it even does not include  
 160 the steepest descent. Second, as noted above, the proofs of rate estimates in the continuous DEs  
 161 (in Section 2) require the inequality of convexity (2). Unfortunately, however, existing DGs generally  
 162 do not satisfy it; see Appendix C for a counterexample. Next, we show how to overcome these  
 163 difficulties.

164 *Remark 3.3.* Some members of in the optimization community may find the use of DGs peculiar,  
 165 since it involves referring to two solutions  $x^{(k+1)}, x^{(k)}$ . However, in some sense, it is quite natural  
 166 because the decrease of  $f$  occurs in a single step  $x^{(k)} \mapsto x^{(k+1)}$ . There may also be concerns about  
 167 the computational complexity of DGs because the method becomes “implicit” by referring to  $x^{(k+1)}$ .  
 168 In the field of structure-preserving numerical methods, however, it is widely known that in some  
 169 highly unstable DEs, implicit methods are often advantageous, allowing larger time-stepping widths,  
 170 while explicit methods require extremely small ones. In fact, it has been confirmed in Ehrhardt et al.  
 171 (2018) that this also applies to the optimization context. The Itoh–Abe DG results in a system of  
 172  $d$  nonlinear equations, which is slightly less expensive. Moreover, note that the integral in the AVF  
 173 can be evaluated analytically before implementation, when  $f$  is a polynomial.

## 174 4 Weak discrete gradients and abstract optimization methods

175 We introduce the concept of a *weak discrete gradient* (wDG), which is a relaxed version of the DG  
 176 introduced earlier.

177 **Definition 4.1** (Weak discrete gradient). A gradient approximation<sup>1</sup>  $\bar{\nabla} f: \mathbb{R}^d \times \mathbb{R}^d \rightarrow \mathbb{R}^d$  is said to  
 178 be *weak discrete gradient* of  $f$  if there exists  $\alpha \geq 0$  and  $\beta, \gamma$  with  $\beta + \gamma \geq 0$  such that the following  
 179 two conditions hold for all  $x, y, z \in \mathbb{R}^d$ :

$$f(y) - f(x) \leq \langle \bar{\nabla} f(y, z), y - x \rangle + \alpha \|y - z\|^2 - \beta \|z - x\|^2 - \gamma \|y - x\|^2, \quad \bar{\nabla} f(x, x) = \nabla f(x). \quad (8)$$

180 The condition (8) can be interpreted in two ways. First, it can be understood as a discrete chain rule  
 181 in a weaker sense. By substituting  $x$  with  $z$ , we obtain the inequality:

$$f(y) - f(x) \leq \langle \bar{\nabla} f(y, x), y - x \rangle + (\alpha - \gamma) \|y - x\|^2. \quad (9)$$

182 Compared to the strict discrete chain rule (7), it is weaker because it is an inequality and allows an  
 183 error term. Second, it can be interpreted as a weaker discrete convex inequality. By exchanging  $x$  and  
 184  $y$  and rearranging terms, we obtain another expression

$$f(y) - f(x) - \langle \bar{\nabla} f(x, z), y - x \rangle \geq \beta \|y - x\|^2 + \gamma \|y - z\|^2 - \alpha \|x - z\|^2. \quad (10)$$

185 Compared to the strongly convex inequality (2), the term  $(\mu/2) \|y - x\|^2$  is now replaced with  
 186  $\beta \|y - x\|^2 + \gamma \|y - z\|^2$ , which can be interpreted as the squared distance between  $y$  and the point  
 187  $(x, z)$  where the gradient is evaluated. The term  $-\alpha \|x - z\|^2$  is an error term.

188 We now list some examples of wDGs (proof is provided in Appendix D). Notice that these exam-  
 189 ples include various typical gradient approximations from the optimization and numerical analysis

<sup>1</sup>Notice that we use the notation  $\bar{\nabla}$  here, distinguishing it from  $\nabla_d$  denoted as the standard notation for strict discrete gradients in numerical analysis.

literature. Note that for ease of presentation, we simply write “ $\mu$ -strongly convex function,” which includes convex functions by setting  $\mu = 0$ .

**Theorem 4.2.** *Suppose that  $f: \mathbb{R}^d \rightarrow \mathbb{R}$  is a  $\mu$ -strongly convex function. Let (L) and (SC) denote the additional assumptions: (L)  $f$  is  $L$ -smooth, and (SC)  $\mu > 0$ . Then, the following functions are wDGs:*

- (i) If  $\bar{\nabla}f(y, x) = \nabla f(x)$  and  $f$  satisfies (L), then  $(\alpha, \beta, \gamma) = (L/2, \mu/2, 0)$ .
- (ii) If  $\bar{\nabla}f(y, x) = \nabla f(y)$ , then  $(\alpha, \beta, \gamma) = (0, 0, \mu/2)$ .
- (iii) If  $\bar{\nabla}f(y, x) = \nabla f(\frac{x+y}{2})$  and  $f$  satisfies (L), then  $(\alpha, \beta, \gamma) = ((L + \mu)/8, \mu/4, \mu/4)$ .
- (iv) If  $\bar{\nabla}f(y, x) = \nabla_{\text{AVF}}f(y, x)$  and  $f$  satisfies (L), then  $(\alpha, \beta, \gamma) = (L/6 + \mu/12, \mu/4, \mu/4)$ .
- (v) If  $\bar{\nabla}f(y, x) = \nabla_{\text{G}}f(y, x)$  and  $f$  satisfies (L)(SC), then  $(\alpha, \beta, \gamma) = ((L + \mu)/8 + (L - \mu)^2/16\mu, \mu/4, 0)$ .
- (vi) If  $\bar{\nabla}f(y, x) = \nabla_{\text{IA}}f(y, x)$  and  $f$  satisfies (L)(SC), then  $(\alpha, \beta, \gamma) = (dL^2/\mu - \mu/4, \mu/2, -\mu/4)$ .

Although we assumed the smoothness of  $f$  to simplify the presentation, the case (ii) does not demand it (see the end of Appendix D). Thus, it can handle non-smooth convex optimization. While the wDGs (i), (iii), (iv) only require (L), the wDGs (v) and (vi) demand (SC) ( $\mu > 0$ ). This implies that the latter wDGs might be fragile for small  $\mu$ 's.

We now define an abstract method using wDGs:

$$\frac{x^{(k+1)} - x^{(k)}}{h} = -\bar{\nabla}f(x^{(k+1)}, x^{(k)}), \quad x^{(0)} = x_0, \quad (11)$$

which is analogous to the gradient flow (3). By “abstract,” we mean that it is a formal formula, and given a concrete wDG it reduces to a concrete method; see Table 1 which summarizes some typical choices. Observe that the abstract method covers many popular methods from both optimization and numerical analysis communities. The step size  $h$  may be selected using line search techniques, but for simplicity, we limit our presentation to the fixed step size in this paper (see Remark 5.1).

**Remark 4.3.** Note that some wDGs are not directly connected to the original gradient  $\nabla f$ 's; the Itoh–Abe wDG (vi) does not even refer to the gradient. Thus, the concrete methods resulting from our framework do not necessarily fall into the so-called “first-order methods,” which run in a linear space spanned by the past gradients (Nesterov (1983)). This is why we use the terminology “gradient-based methods” in this paper, instead of first-order methods.

Similar to the aforementioned, we can define abstract methods for (5) and (6). Details and theoretical results can be found in Theorems 5.4 and 5.5.

We also introduce the next lemma, which is useful in expanding the scope of our framework.

**Lemma 4.4.** *Suppose  $f$  can be expressed as a sum of two functions  $f_1, f_2$ . If  $\bar{\nabla}_1 f_1$  and  $\bar{\nabla}_2 f_2$  are wDGs of  $f_1$  and  $f_2$  with parameters  $(\alpha_1, \beta_1, \gamma_1)$  and  $(\alpha_2, \beta_2, \gamma_2)$ , respectively, then  $\bar{\nabla}_1 f_1 + \bar{\nabla}_2 f_2$  is a weak discrete gradient of  $f$  with  $(\alpha, \beta, \gamma) = (\alpha_1 + \alpha_2, \beta_1 + \beta_2, \gamma_1 + \gamma_2)$ .*

This lemma allows us to consider the following discretization of the gradient flow:

$$\frac{x^{(k+1)} - x^{(k)}}{h} = -\nabla f_1(x^{(k)}) - \nabla f_2(x^{(k+1)}) \quad (12)$$

within our framework. For instance, if  $f_1$  is  $L_1$ -smooth and  $\mu_1$ -strongly convex, and  $f_2$  is  $\mu_2$ -strongly convex, then the right-hand side of (12) is a wDG with  $(\alpha, \beta, \gamma) = (L_1/2, \mu_1/2, \mu_2/2)$ . In this case, the method is known as the proximal gradient method or the forward-backward splitting algorithm in optimization (cf. Bauschke and Combettes (2017)). Discretizing the accelerated gradient flows allows for obtaining accelerated versions. (Acceleration of the proximal gradient method has been studied for some time (Beck and Teboulle, 2009b,a).)

Table 1: Examples of wDGs and their corresponding convergence rates for a  $\mu$ -strongly convex and  $L$ -smooth function  $f$  on  $\mathbb{R}^d$ . The numbers in the  $\bar{\nabla}f$  column correspond to the numbers in Theorem 4.2. The line in the figure corresponding to the proximal gradient method is described in the setting of (12). The notation (DG) represents a strict discrete gradient. The convergence rates shown in the table are the best possible for the step sizes chosen in Theorems 5.3 and 5.5.

| $\bar{\nabla}f$ | Opt. meth.<br>(for (3)) | Numer. meth.  | Convergence rates                                                        |                                                                         |
|-----------------|-------------------------|---------------|--------------------------------------------------------------------------|-------------------------------------------------------------------------|
|                 |                         |               | Theorem 5.3                                                              | Theorem 5.5                                                             |
| (i)             | steep. des.             | exp. Euler    | $O\left(\left(1 - 2\frac{\mu}{L+\mu}\right)^k\right)$                    | $O\left(\left(1 - \sqrt{\frac{\mu}{L}}\right)^k\right)$                 |
| (ii)            | prox. point             | imp. Euler    | 0                                                                        | 0                                                                       |
| (i)+(ii)        | prox. grad.             | (splitting)   | $O\left(\left(1 - 2\frac{\mu_1+\mu_2}{L_1+\mu_1+2\mu_2}\right)^k\right)$ | $O\left(\left(1 - \sqrt{\frac{\mu_1+\mu_2}{L_1+\mu_2}}\right)^k\right)$ |
| (iii)           | —                       | imp. midpoint | $O\left(\left(1 - 8\frac{\mu}{L+7\mu}\right)^k\right)$                   | $O\left(\left(1 - \sqrt{\frac{4\mu}{L+3\mu}}\right)^k\right)$           |
| (iv)            | —                       | AVF (DG)      | $O\left(\left(1 - 6\frac{\mu}{L+5\mu}\right)^k\right)$                   | $O\left(\left(1 - \sqrt{\frac{3\mu}{L+2\mu}}\right)^k\right)$           |
| (v)             | —                       | Gonzalez (DG) | $O\left(\left(1 - 8\frac{\mu^2}{L^2+4\mu^2}\right)^k\right)$             | $O\left(\left(1 - \sqrt{\frac{4\mu^2}{L^2+3\mu^2}}\right)^k\right)$     |
| (vi)            | —                       | Itoh–Abe (DG) | $O\left(\left(1 - 2\frac{\mu^2}{4d^2L^2-\mu^2}\right)^k\right)$          | $O\left(\left(1 - \sqrt{\frac{\mu^2}{4dL^2-2\mu^2}}\right)^k\right)$    |

## 5 Convergence rates of abstract optimization methods

We establish the discrete counterparts of Theorems 2.1 to 2.3 and 2.5. Although the proofs are left to Appendix E, we emphasize that they can be performed analogously to those of the continuous cases. The discrete theorems are established in four cases: the gradient flow (3) (for  $f$  convex and  $\mu$ -strongly convex), and the accelerated flows (for  $f$  convex (5) and  $\mu$ -strongly convex (6)). For ease of understanding, we summarize the results for  $\mu$ -strongly convex cases in Table 1. A similar table for convex cases is included in Appendix A.

*Remark 5.1.* The following theorems are presented under the assumption that the step size  $h$  is fixed for simplicity. However, if all varying step sizes satisfy the step size condition (with a finite number of violations allowed), the theorems still hold true. The step sizes must be bounded by a positive number from below to ensure the designated rates.)

### 5.1 For the abstract method based on the gradient flow

The abstract method is given in (11).

**Theorem 5.2** (Convex case). *Let  $\bar{\nabla}f$  be a wDG of  $f$  and suppose that  $\beta \geq 0, \gamma \geq 0$ . Let  $f$  be a convex function that additionally satisfies the necessary conditions required by the wDG. Let  $\{x^{(k)}\}$  be the sequence given by (11). Then, under the step size condition  $h \leq 1/(2\alpha)$ , the sequence satisfies*

$$f(x^{(k)}) - f^* \leq \frac{\|x_0 - x^*\|^2}{2kh}.$$

Let us demonstrate how to use the theorem using the proximal gradient method (12) as an example. Suppose that  $f_1$  is  $L_1$ -smooth and convex, and  $f_2$  is convex. Then,  $\bar{\nabla}f(y, x) = \nabla f_1(x) + \nabla f_2(y)$  is a wDG with the parameter  $(\alpha, \beta, \gamma) = (L_1/2, 0, 0)$  due to Theorem 4.2 and Lemma 4.4. Therefore, the proximal gradient method (12) satisfies the assumption of Theorem 5.2 and thus the convergence rate is  $O(1/k)$  under the step size condition  $h \leq (1/L_1)$ .

**Theorem 5.3** (Strongly convex case). *Let  $\bar{\nabla}f$  be a wDG of  $f$  and suppose that  $\beta + \gamma > 0$ . Let  $f$  be a strongly convex function that additionally satisfies the necessary conditions that the weak DG requires. Let  $\{x^{(k)}\}$  be the sequence given by (11). Then, under the step size condition  $h \leq 1/(\alpha + \beta)$ , the*

255 *sequence satisfies*

$$f(x^{(k)}) - f^* \leq \left(1 - \frac{2(\beta + \gamma)h}{1 + 2\gamma h}\right)^k \|x_0 - x^*\|^2.$$

256 *In particular, the sequence satisfies*

$$f(x^{(k)}) - f^* \leq \left(1 - \frac{2(\beta + \gamma)}{\alpha + \beta + 2\gamma}\right)^k \|x_0 - x^*\|^2,$$

257 *when the optimal step size  $h = 1/(\alpha + \beta)$  is employed.*

## 258 5.2 For the abstract methods based on the accelerated gradient flows

259 We consider abstract methods with wDGs based on the accelerated gradient flows (5) and (6), which  
 260 will be embedded in the theorems below. We note one thing: when using (8) as an approximation of  
 261 the chain rule, we can determine  $z$  independently of  $x$  and  $y$ , which gives us some degrees of freedom  
 262 (thus allowing for adjustment.) Below we show some choices of  $z^{(k)}$  that are easy to calculate from  
 263 known values while keeping the decrease of the Lyapunov functional.

264 **Theorem 5.4** (Convex case). *Let  $\bar{\nabla}f$  be a wDG of  $f$  and suppose that  $\beta \geq 0, \gamma \geq 0$ . Let  $f$  be  
 265 a convex function that additionally satisfies the necessary conditions that the wDG requires. Let  
 266  $\{(x^{(k)}, v^{(k)})\}$  be the sequence given by*

$$\begin{cases} \delta^+ x^{(k)} = \frac{\delta^+ A_k}{A_k} (v^{(k+1)} - x^{(k+1)}), \\ \delta^+ v^{(k)} = -\frac{\delta^+ A_k}{4} \bar{\nabla}f(x^{(k+1)}, z^{(k)}), \\ \frac{z^{(k)} - x^{(k)}}{h} = \frac{\delta^+ A_k}{A_{k+1}} (v^{(k)} - x^{(k)}) \end{cases}$$

267 *with  $(x^{(0)}, v^{(0)}) = (x_0, v_0)$ , where  $A_k := A(kh)$ . Then if  $A_k = (kh)^2$  and  $h \leq 1/\sqrt{2\alpha}$ , the  
 268 sequence satisfies*

$$f(x^{(k)}) - f^* \leq \frac{2\|x_0 - x^*\|^2}{A_k}.$$

269 **Theorem 5.5** (Strongly convex case). *Let  $\bar{\nabla}f$  be a wDG of  $f$  and suppose that  $\beta + \gamma > 0$ . Let  $f$  be  
 270 a strongly convex function that additionally satisfies the necessary conditions that the wDG requires.  
 271 Let  $\{(x^{(k)}, v^{(k)})\}$  be the sequence given by*

$$\begin{cases} \delta^+ x^{(k)} = \sqrt{2(\beta + \gamma)} (v^{(k+1)} - x^{(k+1)}), \\ \delta^+ v^{(k)} = \sqrt{2(\beta + \gamma)} \left( \frac{\beta}{\beta + \gamma} z^{(k)} + \frac{\gamma}{\beta + \gamma} x^{(k+1)} - v^{(k+1)} - \frac{\bar{\nabla}f(x^{(k+1)}, z^{(k)})}{2(\beta + \gamma)} \right), \\ \frac{z^{(k)} - x^{(k)}}{h} = \sqrt{2(\beta + \gamma)} (x^{(k)} + v^{(k)} - 2z^{(k)}) \end{cases}$$

272 *with  $(x^{(0)}, v^{(0)}) = (x_0, v_0)$ . Then if  $h \leq \bar{h} := (\sqrt{2}(\sqrt{\alpha + \gamma} - \sqrt{\beta + \gamma}))^{-1}$ , the sequence satisfies*

$$f(x^{(k)}) - f^* \leq \left(1 + \sqrt{2(\beta + \gamma)}h\right)^{-k} \left(f(x_0) - f^* + \beta\|v_0 - x^*\|^2\right).$$

273 *In particular, the sequence satisfies*

$$f(x^{(k)}) - f^* \leq \left(1 - \sqrt{\frac{\beta + \gamma}{\alpha + \gamma}}\right)^k \left(f(x_0) - f^* + \beta\|v_0 - x^*\|^2\right),$$

274 *when the optimal step size  $h = \bar{h}$  is employed.*

275 **Remark 5.6.** Time scaling can eliminate the factor  $\sqrt{2(\beta + \gamma)}$  from the scheme and simplify it, as  
 276 shown in Luo and Chen (2022). However, we do not use time scaling here to match the time scale  
 277 with the accelerated gradient method and to maintain correspondence with the continuous system.



## 6 Discussions including Limitations

**Relation to some other systematic/unified frameworks** A systematic approach to obtaining optimization methods with convergence estimates was developed using the “performance estimation problems” (PEPs) technique, as seen in works such as Taylor et al. (2018); Taylor and Drori (2022b). While our framework unifies discussions in both the continuous and discrete settings, the design of methods is not automatic and requires finding a new WDG. In contrast, the PEP framework automates method design but separates discussions between the continuous and discrete settings. Combining these two approaches could be a promising research direction, such as applying our framework to the Lyapunov functionals obtained in Taylor and Drori (2022b).

Another unified convergence analysis is presented in Chen and Luo (2021), where the authors cite the same passage in the Introduction from Su et al. (2016). However, this seems to focus on unifying discussions in the continuous setting, and it is still necessary to individualize the discretization for each method in the discrete setting.

In Diakonikolas and Orecchia (2019), a unified method for deriving continuous DEs describing first-order optimization methods was proposed using the “approximate duality gap technique.” While this work is capable of finding new DEs, it does not provide insight into how to discretize the DEs for obtaining discrete optimization methods.

**Limitations of the proposed framework.** Although we believe that the current framework provides an easy environment for working on the DE approach to optimization, it still has some limitations.

First, methods that do not fall into the current framework exist, such as the following splitting method (cf. the Douglas–Rachford splitting method (Eckstein and Bertsekas, 1992)):

$$\frac{x^{(k+1/2)} - x^{(k)}}{h} = -\bar{\nabla}_1 f_1(x^{(k+1/2)}, x^{(k)}), \quad \frac{x^{(k+1)} - x^{(k+1/2)}}{h} = -\bar{\nabla}_2 f_2(x^{(k+1)}, x^{(k+1/2)}).$$

The right-hand side cannot be written by a single wDG. Additionally, methods based on Runge–Kutta (RK) numerical methods (Zhang et al. (2018); Ushiyama et al. (2022)) appear difficult to be captured by wDG because RK methods cannot be expressed by DG in the first place. Investigating whether these methods can be captured by the concept of DG is an interesting future research topic.

Second, there is still some room for adjustment in wDG methods. A typical example is  $z^{(k)}$  in Section 5.2, which is chosen in the theorems to optimize efficiency and rates. Another example is the adjustment of time-stepping in the last phase of constructing a method to achieve a better rate or practical efficiency. Although these optimizations in the construction of optimization methods are standard in optimization studies, we feel that they are difficult to capture in the current framework, as they fall between the intuitive continuous argument and the discrete wDG arguments that aim to capture common structures.

Third, some rates in the theorems are not optimal. For example, on strongly convex functions, the scheme proposed in Theorem 5.5 with the choice (i) achieves the convergence rate of  $O\left((1 - \sqrt{\mu/L})^k\right)$ , which is not the optimal rate of  $O\left((1 - \sqrt{\mu/L})^{2k}\right)$ . This is because the choice of the DE and Lyapunov functional used in this work is not optimal. A DE and Lyapunov functional for obtaining the optimal rate are known (Sun et al., 2020), but the DE is a so-called high-resolution DE (known as a “modified equation” in numerical analysis), which involves Hessian. Whether these DEs can be captured with the wDG perspective is an interesting future research topic.

## 7 Concluding remarks

In this paper, we proposed a new unified discretization framework for the DE approach to convex optimization. Our framework provides an easy environment for those working on the DE approach, and some new methods are immediate from the framework, both as methods and for their convergence estimates. For example, any combination of strict DGs with the accelerated gradient flows are new methods, and their rates are given by the theorems. Although we did not include numerical experiments in the main body owing to the space restrictions, some preliminary numerical tests confirming the theory can be found in Appendix I. These tests show that some new methods can be competitive with state-of-the-art methods, such as Nesterov’s accelerated gradient.

## References

- Alvarez, F. (2000). On the minimizing property of a second order dissipative system in Hilbert spaces. *SIAM J. Control Optim.*, 38(4):1102–1119.
- Alvarez, F., Attouch, H., Bolte, J., and Redont, P. (2002). A second-order gradient-like dissipative dynamical system with Hessian-driven damping. Application to optimization and mechanics. *J. Math. Pures Appl.* (9), 81(8):747–779.
- Attouch, H. and Cabot, A. (2017). Asymptotic stabilization of inertial gradient dynamics with time-dependent viscosity. *J. Differential Equations*, 263(9):5412–5458.
- Attouch, H., Chbani, Z., and Riahi, H. (2018). Combining fast inertial dynamics for convex optimization with Tikhonov regularization. *J. Math. Anal. Appl.*, 457(2):1065–1094.
- Attouch, H., Peypouquet, J., and Redont, P. (2016). Fast convex optimization via inertial dynamics with Hessian driven damping. *J. Differential Equations*, 261(10):5734–5783.
- Bauschke, H. H. and Combettes, P. L. (2017). *Convex analysis and monotone operator theory in Hilbert spaces*. CMS Books in Mathematics/Ouvrages de Mathématiques de la SMC. Springer, Cham, second edition.
- Beck, A. and Teboulle, M. (2009a). Fast gradient-based algorithms for constrained total variation image denoising and deblurring problems. *IEEE Trans. Image Process.*, 18(11):2419–2434.
- Beck, A. and Teboulle, M. (2009b). A fast iterative shrinkage-thresholding algorithm for linear inverse problems. *SIAM J. Imaging Sci.*, 2(1):183–202.
- Benning, M., Riis, E. S., and Schönlieb, C.-B. (2020). Bregman Itoh-Abe methods for sparse optimisation. *J. Math. Imaging Vision*, 62(6-7):842–857.
- Bruck, Jr., R. E. (1975). Asymptotic convergence of nonlinear contraction semigroups in Hilbert space. *J. Functional Analysis*, 18:15–26.
- Cabot, A., Engler, H., and Gadat, S. (2009). On the long time behavior of second order differential equations with asymptotically small dissipation. *Trans. Amer. Math. Soc.*, 361(11):5983–6017.
- Celledoni, E., Eidnes, S., Owren, B., and Ringholm, T. (2018). Dissipative numerical schemes on Riemannian manifolds with applications to gradient flows. *SIAM J. Sci. Comput.*, 40(6):A3789–A3806.
- Chen, L. and Luo, H. (2021). A unified convergence analysis of first order convex optimization methods via strong lyapunov functions. *arXiv preprint*, arXiv:2108.00132.
- Defazio, A. (2019). On the curved geometry of accelerated optimization. In Wallach, H., Larochelle, H., Beygelzimer, A., d'Alché-Buc, F., Fox, E., and Garnett, R., editors, *Advances in Neural Information Processing Systems*, volume 32. Curran Associates, Inc.
- Diakonikolas, J. and Orecchia, L. (2019). The approximate duality gap technique: a unified theory of first-order methods. *SIAM J. Optim.*, 29(1):660–689.
- Drori, Y. and Taylor, A. (2022). On the oracle complexity of smooth strongly convex minimization. *J. Complexity*, 68:101590.
- Du, D. (2022). Lyapunov function approach for approximation algorithm design and analysis: with applications in submodular maximization. *arXiv preprint*, arXiv:2205.12442.
- Eckstein, J. and Bertsekas, D. P. (1992). On the Douglas-Rachford splitting method and the proximal point algorithm for maximal monotone operators. *Math. Programming*, 55(3, Ser. A):293–318.
- Ehrhardt, M. J., Riis, E. S., Ringholm, T., and Schönlieb, C.-B. (2018). A geometric integration approach to smooth optimisation: Foundations of the discrete gradient method. *arXiv preprint*, arXiv:1805.06444.

370 França, G., Robinson, D., and Vidal, R. (2018). ADMM and accelerated ADMM as continuous  
371 dynamical systems. In Dy, J. and Krause, A., editors, *Proceedings of the 35th International*  
372 *Conference on Machine Learning*, pages 1559–1567. PMLR.

373 Gonzalez, O. (1996). Time integration and discrete Hamiltonian systems. *J. Nonlinear Sci.*, 6(5):449–  
374 467.

375 Grimm, V., McLachlan, R. I., McLaren, D. I., Quispel, G. R. W., and Schönlieb, C.-B. (2017). Discrete  
376 gradient methods for solving variational image regularisation models. *J. Phys. A*, 50(29):295201,  
377 21.

378 Itoh, T. and Abe, K. (1988). Hamiltonian-conserving discrete canonical equations based on variational  
379 difference quotients. *J. Comput. Phys.*, 76(1):85–102.

380 Karimi, S. and Vavasis, S. A. (2016). A unified convergence bound for conjugate gradient and  
381 accelerated gradient. *arXiv preprint*, arXiv:1605.00320.

382 Krichene, W., Bayen, A., and Bartlett, P. L. (2015). Accelerated mirror descent in continuous and  
383 discrete time. In Cortes, C., Lawrence, N., Lee, D., Sugiyama, M., and Garnett, R., editors,  
384 *Advances in Neural Information Processing Systems*, volume 28. Curran Associates, Inc.

385 Luo, H. and Chen, L. (2022). From differential equation solvers to accelerated first-order methods  
386 for convex optimization. *Math. Program.*, 195:735–781.

387 McLachlan, R. I., Quispel, G. R. W., and Robidoux, N. (1999). Geometric integration using discrete  
388 gradients. *R. Soc. Lond. Philos. Trans. Ser. A Math. Phys. Eng. Sci.*, 357(1754):1021–1045.

389 Miyatake, Y., Sogabe, T., and Zhang, S.-L. (2018). On the equivalence between SOR-type methods  
390 for linear systems and the discrete gradient methods for gradient systems. *J. Comput. Appl. Math.*,  
391 342:58–69.

392 Nesterov, Y. (2018). *Lectures on convex optimization*, volume 137 of *Springer Optimization and Its*  
393 *Applications*. Springer, Cham.

394 Nesterov, Y. E. (1983). A method for solving the convex programming problem with convergence  
395 rate  $O(1/k^2)$ . *Dokl. Akad. Nauk SSSR*, 269(3):543–547.

396 Polyak, B. T. (1963). Gradient methods for the minimisation of functionals. *USSR Comput. Math.*  
397 *Math. Phys.*, 3(4):864–878.

398 Polyak, B. T. (1964). Some methods of speeding up the convergence of iterative methods. *USSR*  
399 *Comput. Math. Math. Phys.*, 4(5):1–17.

400 Quispel, G. R. W. and Capel, H. W. (1996). Solving ODE’s numerically while preserving a first  
401 integral. *Phys. Lett.*, 218A:223–228.

402 Quispel, G. R. W. and McLaren, D. I. (2008). A new class of energy-preserving numerical integration  
403 methods. *J. Phys. A*, 41(4):045206, 7.

404 Riis, E. S., Ehrhardt, M. J., Quispel, G. R. W., and Schönlieb, C.-B. (2022). A geometric integration  
405 approach to nonsmooth, nonconvex optimisation. *Found. Comput. Math.*, 22(5):1351–1394.

406 Ringholm, T., Lazić, J., and Schönlieb, C.-B. (2018). Variational image regularization with Euler’s  
407 elastica using a discrete gradient scheme. *SIAM J. Imaging Sci.*, 11(4):2665–2691.

408 Shi, B., Du, S. S., Su, W., and Jordan, M. I. (2019). Acceleration via symplectic discretization of  
409 high-resolution differential equations. In Wallach, H., Larochelle, H., Beygelzimer, A., d’Alché-  
410 Buc, F., Fox, E., and Garnett, R., editors, *Advances in Neural Information Processing Systems*,  
411 volume 32. Curran Associates, Inc.

412 Su, W., Boyd, S., and Candès, E. J. (2014). A differential equation for modeling nesterov’s accelerated  
413 gradient method: theory and insights. *Advances in neural information processing systems*, 27.

414 Su, W., Boyd, S., and Candès, E. J. (2016). A differential equation for modeling Nesterov’s accelerated  
415 gradient method: theory and insights. *J. Mach. Learn. Res.*, 17(153):1–43.

416 Suh, J. J., Roh, G., and Ryu, E. K. (2022). Continuous-time analysis of accelerated gradient methods  
417 via conservation laws in dilated coordinate systems. In Chaudhuri, K., Jegelka, S., Song, L.,  
418 Szepesvari, C., Niu, G., and Sabato, S., editors, *Proceedings of the 39th International Conference*  
419 *on Machine Learning*, pages 20640–20667. PMLR.

420 Sun, B., George, J., and Kia, S. (2020). High-resolution modeling of the fastest first-order optimization  
421 method for strongly convex functions. In *2020 59th IEEE Conference on Decision and Control*  
422 *(CDC)*, pages 4237–4242.

423 Taylor, A. and Drori, Y. (2022a). An optimal gradient method for smooth strongly convex minimiza-  
424 tion. *Math. Program.*, pages 1–38.

425 Taylor, A. and Drori, Y. (2022b). An optimal gradient method for smooth strongly convex minimiza-  
426 tion. *Mathematical Programming*, pages 1–38.

427 Taylor, A., Van Scoy, B., and Lessard, L. (2018). Lyapunov functions for first-order methods: Tight  
428 automated convergence guarantees. In *International Conference on Machine Learning*, pages  
429 4897–4906. PMLR.

430 Ushiyama, K., Sato, S., and Matsuo, T. (2022). Deriving efficient optimization methods based on  
431 stable explicit numerical methods. *JSIAM Lett.*, 14:29–32.

432 Van Scoy, B., Freeman, R. A., and Lynch, K. M. (2018). The fastest known globally convergent  
433 first-order method for minimizing strongly convex functions. *IEEE Control Syst. Lett.*, 2(1):49–54.

434 Wilson, A. (2018). *Lyapunov arguments in optimization*. University of California, Berkeley.

435 Wilson, A. C., Recht, B., and Jordan, M. I. (2021). A Lyapunov analysis of accelerated methods in  
436 optimization. *J. Mach. Learn. Res.*, 22(113):1–34.

437 Zhang, J., Mokhtari, A., Sra, S., and Jadbabaie, A. (2018). Direct runge-kutta discretization achieves  
438 acceleration. In Bengio, S., Wallach, H., Larochelle, H., Grauman, K., Cesa-Bianchi, N., and  
439 Garnett, R., editors, *Advances in Neural Information Processing Systems*, volume 31. Curran  
440 Associates, Inc.

## A Table summarizing the convex cases

In contrast to the strongly-convex cases, in the convex cases the convergence rates are the same in the order, and the difference appears in its coefficients, which actually depends on the maximum step sizes allowed. See Theorems 5.2 and 5.4 for the rates. In the table below we summarize the step size information.

Table 2: Examples of weak discrete gradients and resulting convergence rates when  $f$  is an  $L$ -smooth function on  $\mathbb{R}^d$ . The numbers in the  $\bar{\nabla}f$  column correspond to the numbers in Theorem 4.2. The line of the proximal gradient method is described in the setting of (12). (DG) represents that this weak discrete gradient is a strict discrete gradient.

| $\bar{\nabla}f$ | Opt. meth.  | Numer. meth.  | Max. step sizes |                |
|-----------------|-------------|---------------|-----------------|----------------|
|                 | (for (3))   |               | Theorem 5.3     | Theorem 5.5    |
| (i)             | steep. des. | exp. Euler    | $1/L$           | $1/\sqrt{L}$   |
| (ii)            | prox. point | imp. Euler    | $\infty$        | $\infty$       |
| (i)+(ii)        | prox. grad. | (splitting)   | $1/L_1$         | $1/\sqrt{L_1}$ |
| (iii)           | —           | imp. midpoint | $4/L$           | $2/\sqrt{L}$   |
| (iv)            | —           | AVF (DG)      | $3/L$           | $\sqrt{3/L}$   |

## B Proofs of theorems in Section 2

### B.1 Proof of Theorem 2.1

It is sufficient to show that a Lyapunov function

$$E(t) := t(f(x(t)) - f^*) + \frac{1}{2}\|x(t) - x^*\|^2$$

is monotonically nonincreasing since

$$f(x(t)) - f^* \leq \frac{E(t)}{t} \leq \frac{E(0)}{t} = \frac{\|x(0) - x^*\|^2}{2t}.$$

Indeed,

$$\begin{aligned} \dot{E} &= t\langle \nabla f(x), \dot{x} \rangle + f(x) - f^* + \langle x - x^*, \dot{x} \rangle \\ &= -t\|\nabla f(x)\|^2 + f(x) - f^* - \langle \nabla f(x), x - x^* \rangle \\ &\leq 0 \end{aligned}$$

holds. Here, at each line, we applied the Leibniz rule and the chain rule, substituted the ODE, and used the convexity of  $f$  in this order. ■

### B.2 Proof of Theorem 2.2

It is sufficient to show a Lyapunov function

$$E(t) := e^{\mu t} \left( f(x(t)) - f^* + \frac{\mu}{2}\|x(t) - x^*\|^2 \right)$$

is monotonically nonincreasing and thus it is sufficient to show that  $\tilde{E}(t) := e^{-\mu t}E(t)$  satisfies

$\dot{\tilde{E}} \leq -\mu\tilde{E}$ . Indeed,

$$\begin{aligned} \dot{\tilde{E}} &= \langle \nabla f(x), \dot{x} \rangle + \mu\langle x - x^*, \dot{x} \rangle \\ &= -\|\nabla f(x)\|^2 - \mu\langle \nabla f(x), x - x^* \rangle \\ &\leq -\|\nabla f(x)\|^2 - \mu \left( f(x) - f^* + \frac{\mu}{2}\|x - x^*\|^2 \right) \\ &\leq -\mu\tilde{E} \end{aligned}$$

holds. Here, at each line, we applied the chain rule, substituted the ODE, and used strong convexity of  $f$  in this order. ■

### 459 B.3 Proof of Theorem 2.3

460 It is sufficient to show that

$$E(t) := A(t)(f(x(t)) - f^*) + 2\|v(t) - x^*\|^2$$

461 is nonincreasing. Actually,

$$\begin{aligned} \dot{E} &= \dot{A}(f(x) - f^*) + A \frac{d}{dt}(f(x) - f^*) + \frac{d}{dt}(2\|v(t) - x^*\|^2) \\ &= \dot{A}(f(x) - f^*) + A \langle \nabla f(x), \dot{x} \rangle + 4 \langle \dot{v}, v - x^* \rangle \\ &= \dot{A}(f(x) - f^*) + A \left\langle \nabla f(x), \frac{\dot{A}}{A}(v - x) \right\rangle - 4 \left\langle \frac{\dot{A}}{4} \nabla f(x), v - x^* \right\rangle \\ &= \dot{A}(f(x) - f^* - \langle \nabla f(x), x - x^* \rangle) \\ &\leq 0 \end{aligned}$$

462 holds. Here, at each line, we applied the Leibniz rule, used the chain rule, substituted the ODE, and  
463 used the convexity of  $f$  in this order. ■

### 464 B.4 Proof of Theorem 2.5

465 It is sufficient to show that

$$E(t) := e^{\sqrt{\mu}t} \left( f(x) - f^* + \frac{\mu}{2} \|v - x^*\|^2 \right)$$

466 is nonincreasing and thus it is sufficient to show that  $\tilde{E}(t) := e^{-\sqrt{\mu}t} E(t)$  satisfies  $\dot{\tilde{E}} \leq -\sqrt{\mu} \tilde{E}$ .  
467 Actually,

$$\begin{aligned} \dot{\tilde{E}} &= \langle \nabla f(x), \dot{x} \rangle + \mu \langle \dot{v}, v - x^* \rangle \\ &= \langle \nabla f(x), \sqrt{\mu}(v - x) \rangle + \mu \langle \sqrt{\mu}(x - v - \nabla f(x)/\mu), v - x^* \rangle \\ &= \sqrt{\mu} (\langle \nabla f(x), x^* - x \rangle - \mu \langle v - x, v - x^* \rangle) \\ &= \sqrt{\mu} \left( \langle \nabla f(x), x^* - x \rangle - \frac{\mu}{2} (\|v - x\|^2 + \|v - x^*\|^2 - \|x - x^*\|^2) \right) \\ &\leq -\sqrt{\mu} \left( \left( f(x) - f^* + \frac{\mu}{2} \|v - x^*\|^2 \right) - \frac{\mu}{2} \|v - x\|^2 \right) \\ &\leq -\sqrt{\mu} \tilde{E} \end{aligned}$$

468 holds. Here, at each line, we applied the chain rule, substituted the ODE, rearranged terms, decom-  
469 posed the inner product by the law of cosines (see Appendix F), and used the strong convexity of  
470  $f$ . ■

## 471 C Strict discrete gradients and convexity

472 In this section, we describe that strict discrete gradients are not generally compatible with the convex  
473 inequality; this complements the discussion in Section 3. For example, let us consider imitating the  
474 discussion in Appendix B.1 by using a discrete gradient scheme  $\delta^+ x^{(k)} = -\nabla_d f(x^{(k+1)}, x^{(k)})$ .  
475 Then, since we use the inequality

$$f(x) - f^* - \langle \nabla f(x), x - x^* \rangle \leq 0$$

476 that holds due to the convexity of  $f$ , we should ensure that the discrete counterpart of the left-hand  
477 side

$$f(x) - f^* - \langle \nabla_d f(y, x), x - x^* \rangle$$

478 is nonpositive for any  $x, y \in \mathbb{R}^d$ . However, there is a simple counterexample as shown below.

479 Let us consider a quadratic and convex objective function  $f(x) = \frac{1}{2} \langle x, Qx \rangle$ , where  $Q \in \mathbb{R}^{d \times d}$  is a  
480 positive definite matrix. In this case,  $x^* = 0$  and  $f^* = 0$  hold. Then, when we choose a discrete  
481 gradient  $\nabla_d f(y, x) = \nabla_G f(y, x) = \nabla_{\text{AVF}} f(y, x) = Q \left( \frac{y+x}{2} \right)$ , we see

$$f(x) - f^* - \langle \nabla_d f(y, x), x - x^* \rangle = \frac{1}{2} \langle x, Qx \rangle - \left\langle Q \left( \frac{y+x}{2} \right), x \right\rangle = -\frac{1}{2} \langle y, Qx \rangle,$$

482 which is positive when  $y = -x$  and  $x \neq 0$ .

## 483 D Proof of Theorem 4.2

484 (i) Since we assume  $f$  is  $L$ -smooth and  $\mu$ -strongly convex,

$$\begin{aligned} f(y) - f(z) &\leq \langle \nabla f(z), y - z \rangle + \frac{L}{2} \|y - z\|^2, \\ f(z) - f(x) &\leq \langle \nabla f(z), z - x \rangle - \frac{\mu}{2} \|z - x\|^2 \end{aligned}$$

485 holds for any  $x, y, z \in \mathbb{R}^d$ . By adding each side of these inequalities, we obtain

$$f(y) - f(x) \leq \langle \nabla f(z), y - x \rangle + \frac{L}{2} \|y - z\|^2 - \frac{\mu}{2} \|z - x\|^2. \quad (13)$$

486 (This inequality is known as the three points descent lemma in optimization.)

487 (ii) It follows immediately from the  $\mu$ -strong convexity of  $f$ .

488 (iii) By replacing  $z$  in (13) with  $\theta y + (1 - \theta)z$ , and invoking Lemma F.2, we have

$$\begin{aligned} f(y) - f(x) - \langle \nabla f(\theta y + (1 - \theta)z), y - x \rangle \\ \leq \frac{L}{2} \|y - (\theta y + (1 - \theta)z)\|^2 - \frac{\mu}{2} \|\theta y + (1 - \theta)z - x\|^2 \\ = \frac{L}{2} (1 - \theta)^2 \|y - z\|^2 - \frac{\mu}{2} (-\theta(1 - \theta)\|y - z\|^2 + (1 - \theta)\|z - x\|^2 + \theta\|y - x\|^2). \end{aligned}$$

489 Especially when  $\theta = 1/2$ ,  $(\alpha, \beta, \gamma) = (L/8 + \mu/8, \mu/4, \mu/4)$ .

490 (iv) By the same calculation as (iii), we obtain

$$\begin{aligned} f(y) - f(x) - \left\langle \int_0^1 \nabla f(\tau y + (1 - \tau)z) d\tau, y - x \right\rangle \\ = \int_0^1 [f(y) - f(x) - \langle \nabla f(\tau y + (1 - \tau)z), y - x \rangle] d\tau \\ \leq \int_0^1 \left[ \frac{L}{2} (1 - \tau)^2 \|y - z\|^2 - \frac{\mu}{2} (-\tau(1 - \tau)\|y - z\|^2 + (1 - \tau)\|z - x\|^2 + \tau\|y - x\|^2) \right] d\tau \\ = \left( \frac{L}{6} + \frac{\mu}{12} \right) \|y - z\|^2 - \frac{\mu}{4} \|z - x\|^2 - \frac{\mu}{4} \|y - x\|^2. \end{aligned}$$

491 (v) By (13), we obtain

$$f(y) - f(z) - \left\langle \nabla f\left(\frac{y+z}{2}\right), y - z \right\rangle \leq \frac{L}{2} \left\| y - \frac{y+z}{2} \right\|^2 - \frac{\mu}{2} \left\| \frac{y+z}{2} - z \right\|^2 = \frac{L - \mu}{8} \|y - z\|^2.$$

492 Since this inequality holds with  $y$  and  $z$  swapped, we have

$$\left| f(y) - f(z) - \left\langle \nabla f\left(\frac{y+z}{2}\right), y - z \right\rangle \right| \leq \frac{L - \mu}{8} \|y - z\|^2.$$

493 Thus,

$$\begin{aligned} f(y) - f(x) - \langle \nabla_G f(y, z), y - x \rangle \\ = f(y) - f(x) - \left\langle \nabla f\left(\frac{y+z}{2}\right) + \frac{f(y) - f(z) - \langle \nabla f(\frac{y+z}{2}), y - z \rangle}{\|y - z\|^2} (y - z), y - x \right\rangle \\ \leq f(y) - f(x) - \left\langle \nabla f\left(\frac{y+z}{2}\right), y - x \right\rangle + \left| \frac{f(y) - f(z) - \langle \nabla f(\frac{y+z}{2}), y - z \rangle}{\|y - z\|^2} \right| |\langle y - z, y - x \rangle| \\ \leq \frac{L}{2} \left\| y - \frac{y+z}{2} \right\|^2 - \frac{\mu}{2} \left\| \frac{y+z}{2} - x \right\|^2 + \frac{L - \mu}{8} \left( \frac{L - \mu}{8\mu} \|y - z\|^2 + \frac{2\mu}{L - \mu} \|y - x\|^2 \right) \\ = \frac{L}{8} \|y - z\|^2 - \frac{\mu}{2} \left( \frac{1}{2} \|y - x\|^2 + \frac{1}{2} \|z - x\|^2 - \frac{1}{4} \|y - z\|^2 \right) + \frac{(L - \mu)^2}{16\mu} \|y - z\|^2 + \frac{\mu}{4} \|y - x\|^2 \\ = \left( \frac{L}{8} + \frac{\mu}{8} + \frac{(L - \mu)^2}{16\mu} \right) \|y - z\|^2 - \frac{\mu}{4} \|z - x\|^2 \end{aligned}$$

494 holds, where the second inequality follows from the arithmetic-geometric means (AM-GM)  
 495 inequality.

496 (vi) In the following, for  $y, z \in \mathbb{R}^d$  and  $k = 2, \dots, d$ ,  $y_{1:k-1}z_{k:d}$  denotes a vector  
 497  $(y_1, \dots, y_{k-1}, z_k, \dots, z_d)^\top \in \mathbb{R}^d$ , while  $y_{1:0}z_{1:d}$  and  $y_{1:d}z_{d+1:d}$  denote  $z$  and  $y$ , respectively.  
 498 By the telescoping sum and  $\mu$ -strong convexity of  $f$ , we obtain

$$\begin{aligned}
 & f(y) - f(x) - \langle \nabla_{\text{IA}} f(y, z), y - x \rangle \\
 &= f(y) - f(x) - \sum_{k=1}^d \frac{f(y_{1:k}z_{k+1:d}) - f(y_{1:k-1}z_{k:d})}{y_k - z_k} (y_k - x_k) \\
 &= f(y) - f(x) - \sum_{k=1}^d \frac{f(y_{1:k}z_{k+1:d}) - f(y_{1:k-1}z_{k:d})}{y_k - z_k} (y_k - z_k + z_k - x_k) \\
 &= f(z) - f(x) - \sum_{k=1}^d \frac{f(y_{1:k}z_{k+1:d}) - f(y_{1:k-1}z_{k:d})}{y_k - z_k} (z_k - x_k) \\
 &\leq \langle \nabla f(z), z - x \rangle - \frac{\mu}{2} \|z - x\|^2 \\
 &\quad + \sum_{k=1}^d \begin{cases} \frac{(\nabla f(y_{1:k-1}z_{k:d}))_k (z_k - y_k) - \frac{\mu}{2} (z_k - y_k)^2}{y_k - z_k} (z_k - x_k) & \text{if } \frac{z_k - x_k}{y_k - z_k} > 0 \\ \frac{(\nabla f(y_{1:k}z_{k+1:d}))_k (y_k - z_k) - \frac{\mu}{2} (y_k - z_k)^2}{z_k - y_k} (z_k - x_k) & \text{if } \frac{z_k - x_k}{y_k - z_k} < 0 \end{cases} \\
 &= \langle \nabla f(z), z - x \rangle - \frac{\mu}{2} \|z - x\|^2 \\
 &\quad - \sum_{k=1}^d \begin{cases} (\nabla f(y_{1:k-1}z_{k:d}))_k (z_k - x_k) + \frac{\mu}{2} (y_k - z_k)(z_k - x_k) & \text{if } \frac{z_k - x_k}{y_k - z_k} > 0 \\ (\nabla f(y_{1:k}z_{k+1:d}))_k (z_k - x_k) + \frac{\mu}{2} (z_k - y_k)(z_k - x_k) & \text{if } \frac{z_k - x_k}{y_k - z_k} < 0 \end{cases} \\
 &= \sum_{k=1}^d \begin{cases} ((\nabla f(z))_k - (\nabla f(y_{1:k-1}z_{k:d}))_k)(z_k - x_k) & \text{if } \frac{z_k - x_k}{y_k - z_k} > 0 \\ ((\nabla f(z))_k - (\nabla f(y_{1:k}z_{k+1:d}))_k)(z_k - x_k) & \text{if } \frac{z_k - x_k}{y_k - z_k} < 0 \end{cases} \\
 &\quad - \frac{\mu}{2} \|z - x\|^2 - \frac{\mu}{2} \sum_{k=1}^d |z_k - y_k| |z_k - x_k|.
 \end{aligned}$$

499 To evaluate the first term of the most right-hand side, we use the following inequalities:

$$\begin{aligned}
 |(\nabla f(z))_k - (\nabla f(y_{1:k-1}z_{k:d}))_k| &\leq L \|z - y_{1:k-1}z_{k:d}\| \leq L \|z - y\|, \\
 |(\nabla f(z))_k - (\nabla f(y_{1:k}z_{k+1:d}))_k| &\leq L \|z - y_{1:k}z_{k+1:d}\| \leq L \|z - y\|,
 \end{aligned}$$

500 which hold due to the  $L$ -smoothness of  $f$ , and also

$$\sum_{k=1}^d |z_k - x_k| \leq \sqrt{d \sum_{k=1}^d |z_k - x_k|^2} = \sqrt{d} \|z - x\|,$$

501 which holds due to Jensen's inequality. Using them, we obtain

$$\begin{aligned}
 & f(y) - f(x) - \langle \bar{\nabla}_{\text{IA}} f(y, z), y - x \rangle \\
 &\leq \sqrt{d} L \|z - y\| \|z - x\| - \frac{\mu}{2} \|z - x\|^2 - \frac{\mu}{2} \sum_{k=1}^d |z_k - y_k| |z_k - x_k| \\
 &\leq \frac{dL^2}{\mu} \|z - y\|^2 + \frac{\mu}{4} \|z - x\|^2 - \frac{\mu}{2} \|z - x\|^2 - \frac{\mu}{2} \sum_{k=1}^d |z_k - y_k| |z_k - x_k|,
 \end{aligned}$$



where the last inequality holds due to the AM-GM inequality. Finally, the last term is bounded by

$$\begin{aligned}
\frac{\mu}{2} \sum_{k=1}^d |z_k - y_k| |z_k - x_k| &= -\frac{\mu}{4} \sum_{k=1}^d (|z_k - y_k|^2 + |z_k - x_k|^2 - ||z_k - y_k| - |z_k - x_k||^2) \\
&\leq -\frac{\mu}{4} \sum_{k=1}^d (|z_k - y_k|^2 + |z_k - x_k|^2 - |y_k - x_k|^2) \\
&= -\frac{\mu}{4} (\|z - y\|^2 + \|z - x\|^2 - \|y - x\|^2).
\end{aligned}$$

This proves the theorem. ■

For (ii), as noted in the above proof, the assumption of differentiability of  $f$  is unnecessary, let alone  $L$ -smoothness. Since  $f$  is a proper convex function on  $\mathbb{R}^d$  in our setting, the subdifferential  $\partial f(x)$  is nonempty for all  $x \in \mathbb{R}^d$ . Thus we can use  $\bar{\nabla} f(y, x) \in \partial f(y)$  instead of  $\bar{\nabla} f(y, x) = \nabla f(y)$ . By definition of subgradients, we can recover the same parameters  $(\alpha, \beta, \gamma)$  as the differentiable case.

If  $\mu = 0$ , the proofs for (v) and (vi) cease to work where we apply the AM-GM inequality to the inner product. This is also pointed out in the main body of the paper.

## E Proofs of theorems in Section 5

### E.1 Proof of Theorem 5.2

It is sufficient to show that the discrete Lyapunov function

$$E^{(k)} := kh \left( f(x^{(k)}) - f^* \right) + \frac{1}{2} \|x^{(k)} - x^*\|^2$$

is nonincreasing. Actually,

$$\begin{aligned}
&\delta^+ E^{(k)} \\
&= kh \left( \delta^+ f(x^{(k)}) \right) + f(x^{(k+1)}) - f^* + \delta^+ \left( \frac{1}{2} \|x^{(k)} - x^*\|^2 \right) \\
&\leq kh \left( \left\langle \bar{\nabla} f(x^{(k+1)}, x^{(k)}), \delta^+ x^{(k)} \right\rangle + \alpha h \left\| \delta^+ x^{(k)} \right\|^2 \right) + f(x^{(k+1)}) - f^* + \left\langle x^{(k+1)} - x^*, \delta^+ x^{(k)} \right\rangle - \frac{h}{2} \left\| \delta^+ x^{(k)} \right\|^2 \\
&= -kh(1 - \alpha h) \left\| \bar{\nabla} f(x^{(k+1)}, x^{(k)}) \right\|^2 + f(x^{(k+1)}) - f^* - \left\langle \bar{\nabla} f(x^{(k+1)}, x^{(k)}), x^{(k+1)} - x^* \right\rangle - \frac{h}{2} \left\| \delta^+ x^{(k)} \right\|^2 \\
&\leq -kh(1 - \alpha h) \left\| \bar{\nabla} f(x^{(k+1)}, x^{(k)}) \right\|^2 - \left( \frac{h}{2} - \alpha h^2 \right) \left\| \delta^+ x^{(k)} \right\|^2
\end{aligned}$$

holds, and thus if  $h \leq 1/(2\alpha)$ , the right-hand side is not positive. Here, at each line, we applied the discrete Leibniz rule, the weak discrete gradient condition (8), Lemma F.1 as the chain rule, substituted the scheme, and applied again (8) as the convex inequality. ■

### E.2 Proof of Theorem 5.3

Let

$$\tilde{E}^{(k)} := f(x^{(k)}) - f^* + (\beta + \gamma) \|x^{(k)} - x^*\|^2.$$

521 If  $\delta^+ \tilde{E}^{(k)} \leq -c \tilde{E}^{(k+1)}$  for  $c > 0$ , it can be concluded that  $E^{(k)} = (1 + ch)^k \tilde{E}^{(k)}$  is nonincreasing,  
 522 and hence  $f(x^{(k)}) - f^* \leq (1 + ch)^{-k} E^{(0)}$ . Actually,

$$\begin{aligned}
 & \delta^+ \tilde{E}^{(k)} \\
 &= \delta^+ f(x^{(k)}) + \delta^+ \left( (\beta + \gamma) \|x^{(k)} - x^*\|^2 \right) \\
 &\leq \left\langle \bar{\nabla} f(x^{(k+1)}, x^{(k)}), \delta^+ x^{(k)} \right\rangle + (\alpha - \gamma)h \|\delta^+ x^{(k)}\|^2 + 2(\beta + \gamma) \left\langle x^{(k+1)} - x^*, \delta^+ x^{(k)} \right\rangle - (\beta + \gamma)h \|\delta^+ x^{(k)}\|^2 \\
 &= -(1 - (\alpha - \gamma)h + (\beta + \gamma)h) \|\bar{\nabla} f(x^{(k+1)}, x^{(k)})\|^2 - 2(\beta + \gamma) \left\langle x^{(k+1)} - x^*, \bar{\nabla} f(x^{(k+1)}, x^{(k)}) \right\rangle \\
 &\leq -2(\beta + \gamma) \left( f(x^{(k)}) - f^* + \beta \|x^{(k)} - x^*\|^2 + \gamma \|x^{(k+1)} - x^*\|^2 \right) \\
 &\quad - (1 - (\alpha - \gamma)h + (\beta + \gamma)h - 2\alpha(\beta + \gamma)h^2) \|\bar{\nabla} f(x^{(k+1)}, x^{(k)})\|^2 \tag{14}
 \end{aligned}$$

523 holds. Here, after the second line we used the weak discrete gradient condition (8) as the chain rule,  
 524 substituted the scheme and used (8) as the strongly convex inequality.

525 Now we aim to bound  $\|x^{(k)} - x^*\|^2$  with  $\|x^{(k+1)} - x^*\|^2$ . By the same calculation for  
 526  $\delta^+ \|x^{(k)} - x^*\|^2$  as above, we get the evaluation

$$\delta^+ \|x^{(k)} - x^*\|^2 \leq -2(f(x^{(k+1)}) - f^* + \beta \|x^{(k)} - x^*\|^2 + \gamma \|x^{(k+1)} - x^*\|^2) - (h - 2\alpha h^2) \|\bar{\nabla} f(x^{(k+1)}, x^{(k)})\|^2. \tag{15}$$

527 Thus, if  $h \leq 1/(2\alpha)$ , we get  $\|x^{(k+1)} - x^*\|^2 \leq \|x^{(k)} - x^*\|^2$ . In this case, since the second term of  
 528 (14) is nonpositive, it follows that

$$\delta^+ \tilde{E}^{(k)} \leq -2(\beta + \gamma) \tilde{E}^{(k+1)}.$$

529 To obtain a better rate which is included in the statement of the theorem, by directly using (15) for  
 530 (14), we see

$$\begin{aligned}
 \delta^+ \tilde{E}^{(k)} &\leq -\frac{2(\beta + \gamma)}{1 - 2\beta h} \left( f(x^{(k+1)}) - f^* + (\beta + \gamma) \|x^{(k+1)} - x^*\|^2 \right) \\
 &\quad - \left( \frac{1 - 2\alpha h}{1 - 2\beta h} 2(\beta + \gamma)\beta h^2 + 1 - (\alpha - \gamma)h + (\beta + \gamma)h - 2\alpha(\beta + \gamma)h^2 \right) \|\bar{\nabla} f(x^{(k+1)}, x^{(k)})\|^2.
 \end{aligned}$$

531 Since the second term of the right-hand side is nonpositive under  $h \leq 1/(\alpha + \beta)$ , it can be concluded  
 532 that

$$\delta^+ \tilde{E}^{(k)} \leq -\frac{2(\beta + \gamma)}{1 - 2\beta h} \tilde{E}^{(k+1)}.$$

533 In this case the convergence rate is

$$\left( \frac{1}{1 + \frac{2(\beta + \gamma)h}{1 - 2\beta h}} \right)^k = \left( 1 - \frac{2(\beta + \gamma)h}{1 + 2\gamma h} \right)^k.$$

534 ■

### 535 E.3 Proof of Theorem 5.4

536 It is sufficient to show that

$$E^{(k)} := A_k \left( f(x^{(k)}) - f^* \right) + 2\|v^{(k)} - x^*\|^2$$

537 is nonincreasing. Actually,

$$\begin{aligned}
& \delta^+ E^{(k)} \\
&= (\delta^+ A_k) \left( f(x^{(k+1)}) - f^* \right) + A_k \left( \delta^+ f(x^{(k)}) \right) + 2\delta^+ \left( \|v^{(k)} - x^*\|^2 \right) \\
&\leq (\delta^+ A_k) \left( f(x^{(k+1)}) - f^* \right) + A_k \left\langle \bar{\nabla} f(x^{(k+1)}, z^{(k)}), \delta^+ x^{(k)} \right\rangle \\
&\quad + 4 \left\langle \delta^+ v^{(k)}, v^{(k+1)} - x^* \right\rangle + \frac{A_k}{h} \alpha \|x^{(k+1)} - z^{(k)}\|^2 - 2h \|\delta^+ v^{(k)}\|^2 \\
&\leq (\delta^+ A_k) \left( f(x^{(k+1)}) - f^* \right) + A_k \left\langle \bar{\nabla} f(x^{(k+1)}, z^{(k)}), \frac{\delta^+ A_k}{A_k} (v^{(k+1)} - x^{(k+1)}) \right\rangle \\
&\quad - 4 \left\langle \frac{\delta^+ A_k}{4} \bar{\nabla} f(x^{(k+1)}, z^{(k)}), v^{(k+1)} - x^* \right\rangle + \frac{A_k}{h} \alpha \|x^{(k+1)} - z^{(k)}\|^2 - 2h \|\delta^+ v^{(k)}\|^2 \\
&= (\delta^+ A_k) \left( f(x^{(k+1)}) - f^* - \left\langle \bar{\nabla} f(x^{(k+1)}, z^{(k)}), x^{(k+1)} - x^* \right\rangle \right) + \frac{A_k}{h} \alpha \|x^{(k+1)} - z^{(k)}\|^2 - 2h \|\delta^+ v^{(k)}\|^2 \\
&\leq (\delta^+ A_k) \alpha \|x^{(k+1)} - z^{(k)}\|^2 + \frac{A_k}{h} \alpha \|x^{(k+1)} - z^{(k)}\|^2 - 2h \|\delta^+ v^{(k)}\|^2 \\
&= \frac{1}{h} \left( A_{k+1} \alpha \|x^{(k+1)} - z^{(k)}\|^2 - 2 \|v^{(k+1)} - v^{(k)}\|^2 \right) =: (\text{err}).
\end{aligned}$$

538 Here, at each line, we used the discrete Leibniz rule, applied (8) and Lemma F.1 as the chain rule,  
539 substituted the scheme, and applied again (8) as the convex inequality.

540 Now we define  $z^{(k)}$  so that  $(\text{err}) \leq 0$  holds. When  $z^{(k)} := x^{(k+1)}$ ,  $(\text{err})$  becomes nonpositive  
541 without step size constraints.

542 Or, since using the scheme we can write

$$\|x^{(k+1)} - z^{(k)}\|^2 = \left\| \frac{A_{k+1} - A_k}{A_{k+1}} v^{(k+1)} + \frac{A_k}{A_{k+1}} x^{(k)} - z^{(k)} \right\|^2,$$

543 by setting

$$z^{(k)} := \frac{A_{k+1} - A_k}{A_{k+1}} v^{(k)} + \frac{A_k}{A_{k+1}} x^{(k)},$$

544 we obtain

$$h \times (\text{err}) = \left( \frac{(A_{k+1} - A_k)^2}{A_{k+1}} \alpha - 2 \right) \|v^{(k+1)} - v^{(k)}\|^2.$$

545 This choice of  $z^{(k)}$  is shown in the theorem. When, for example,  $A_k = (kh)^2$ ,  $(\text{err}) \leq 0$ , provided  
546 that  $h \leq 1/\sqrt{2\alpha}$ . Here we see that only up to a quadratic function is allowed as  $A_k$  if  $\alpha > 0$ . ■

#### 547 E.4 Proof of Theorem 5.5

548 It is sufficient to show that

$$\tilde{E}^{(k)} := f(x^{(k)}) - f^* + (\beta + \gamma) \|v^{(k)} - x^*\|^2$$

549 satisfies  $\delta^+ \tilde{E}^{(k)} \leq -\sqrt{m} \tilde{E}^{(k+1)}$ . To simplify notation,  $2(\beta + \gamma)$  is written as  $m$ , and the error terms  
 550 are gathered into (err). Then, we see

$$\begin{aligned}
 \delta^+ \tilde{E}^{(k)} &= \delta^+ f(x^{(k)}) + \frac{m}{2} \delta^+ \|v^{(k)} - x^*\|^2 \\
 &\leq \langle \nabla f(x^{(k+1)}, z^{(k)}), \delta^+ x^{(k)} \rangle + \frac{\alpha}{h} \|x^{(k+1)} - z^{(k)}\|^2 - \frac{\beta}{h} \|z^{(k)} - x^{(k)}\|^2 - \gamma h \|\delta^+ x^{(k)}\|^2 \\
 &\quad + m \langle \delta^+ v^{(k)}, v^{(k+1)} - x^* \rangle - \frac{m}{2} h \|\delta^+ v^{(k)}\|^2 \\
 &= \langle \nabla f(x^{(k+1)}, z^{(k)}), \sqrt{m} (v^{(k+1)} - x^{(k+1)}) \rangle + (\text{err}) \\
 &\quad + m \left\langle \sqrt{m} \left( \frac{2\beta}{m} z^{(k)} + \frac{2\gamma}{m} x^{(k+1)} - v^{(k+1)} - \frac{1}{m} \nabla f(x^{(k+1)}, z^{(k)}) \right), v^{(k+1)} - x^* \right\rangle \\
 &= \sqrt{m} \langle \nabla f(x^{(k+1)}, z^{(k)}), x^* - x^{(k+1)} \rangle - 2\sqrt{m}\beta \langle v^{(k+1)} - z^{(k)}, v^{(k+1)} - x^* \rangle \\
 &\quad - 2\sqrt{m}\gamma \langle v^{(k+1)} - x^{(k+1)}, v^{(k+1)} - x^* \rangle + (\text{err}) \\
 &= \sqrt{m} \langle \nabla f(x^{(k+1)}, z^{(k)}), x^* - x^{(k+1)} \rangle - \sqrt{m}\beta \left( \|v^{(k+1)} - z^{(k)}\|^2 + \|v^{(k+1)} - x^*\|^2 - \|z^{(k)} - x^*\|^2 \right) \\
 &\quad - \sqrt{m}\gamma \left( \|v^{(k+1)} - x^{(k+1)}\|^2 + \|v^{(k+1)} - x^*\|^2 - \|x^{(k+1)} - x^*\|^2 \right) + (\text{err}) \\
 &\leq -\sqrt{m} \left( f(x^{(k+1)}) - f^* + \frac{m}{2} \|v^{(k+1)} - x^*\|^2 \right) \\
 &\quad + \sqrt{m} \left( \alpha \|x^{(k+1)} - z^{(k)}\|^2 - \beta \|v^{(k+1)} - z^{(k)}\|^2 - \gamma \|v^{(k+1)} - x^{(k+1)}\|^2 \right) + (\text{err}) \\
 &= -\sqrt{m} \tilde{E}^{(k+1)} + (\text{err}).
 \end{aligned}$$

551 Here, the first inequality follows from (8) as the chain rule, the second equality from the substitution  
 552 of the form of the method, and the second inequality follows from again (8) as the strongly convex  
 553 inequality. In the second inequality, we also used

$$-\langle \nabla f(x^{(k+1)}, z^{(k)}), x^{(k+1)} - x^* \rangle + \beta \|z^{(k)} - x^*\|^2 + \gamma \|x^{(k+1)} - x^*\|^2 \leq -\left(f(x^{(k+1)}) - f^*\right) + \alpha \|x^{(k+1)} - z^{(k)}\|^2.$$

554 Now we define  $x^{(k)}$  so that (err)  $\leq 0$ . An obvious choice is  $z^{(k)} := x^{(k+1)}$ , where (err) is  
 555 nonpositive under any step size.

556 To derive another definition of  $z^{(k)}$ , we proceed with the calculation of the error terms by substituting  
 557 the form of the method:

$$\begin{aligned}
 h \times (\text{err}) &= \alpha \|x^{(k+1)} - z^{(k)}\|^2 - \beta \|z^{(k)} - x^{(k)}\|^2 - \gamma \|x^{(k+1)} - x^{(k)}\|^2 - (\beta + \gamma) \|v^{(k+1)} - v^{(k)}\|^2 \\
 &\quad + \sqrt{mh} \left( \alpha \|x^{(k+1)} - z^{(k)}\|^2 - \beta \|v^{(k+1)} - z^{(k)}\|^2 - \gamma \|v^{(k+1)} - x^{(k+1)}\|^2 \right) \\
 &= \alpha(h+1) \|x^{(k+1)} - z^{(k)}\|^2 - \beta \left( \|z^{(k)} - x^{(k)}\|^2 + \|v^{(k+1)} - v^{(k)}\|^2 + \sqrt{mh} \|v^{(k+1)} - z^{(k)}\|^2 \right) \\
 &\quad - \gamma \left( \|x^{(k+1)} - x^{(k)}\|^2 + \|v^{(k+1)} - v^{(k)}\|^2 + \sqrt{mh} \|v^{(k+1)} - x^{(k+1)}\|^2 \right) \\
 &= \alpha(h+1) \|x^{(k+1)} - z^{(k)}\|^2 \\
 &\quad - \beta \left( \|z^{(k)} - x^{(k)}\|^2 + \|v^{(k+1)} - v^{(k)}\|^2 + \sqrt{mh} \left\| x^{(k+1)} + \frac{x^{(k+1)} - x^{(k)}}{\sqrt{mh}} - z^{(k)} \right\|^2 \right) \\
 &\quad - \gamma \left( \|x^{(k+1)} - x^{(k)}\|^2 + \|v^{(k+1)} - v^{(k)}\|^2 + \sqrt{mh} \left\| x^{(k+1)} + \frac{x^{(k+1)} - x^{(k)}}{\sqrt{mh}} - x^{(k+1)} \right\|^2 \right).
 \end{aligned}$$

558 Hereafter,  $\sqrt{mh}$  is denoted by  $\tilde{h}$ . By using Lemma F.2, we have

$$\begin{aligned}
& \tilde{h} \left\| x^{(k+1)} + \frac{x^{(k+1)} - x^{(k)}}{\tilde{h}} - z^{(k)} \right\|^2 \\
&= \tilde{h} \left( \frac{\tilde{h}+1}{\tilde{h}} \right)^2 \left\| \frac{\tilde{h}}{\tilde{h}+1} (x^{(k+1)} - z^{(k)}) + \frac{1}{\tilde{h}+1} (x^{(k+1)} - x^{(k)}) \right\|^2 \\
&= \frac{(\tilde{h}+1)^2}{\tilde{h}} \left( \frac{\tilde{h}}{\tilde{h}+1} \|x^{(k+1)} - z^{(k)}\|^2 + \frac{1}{\tilde{h}+1} \|x^{(k+1)} - x^{(k)}\|^2 - \frac{\tilde{h}}{(\tilde{h}+1)^2} \|z^{(k)} - x^{(k)}\|^2 \right) \\
&= (\tilde{h}+1) \|x^{(k+1)} - z^{(k)}\|^2 + \frac{\tilde{h}+1}{\tilde{h}} \|x^{(k+1)} - x^{(k)}\|^2 - \|z^{(k)} - x^{(k)}\|^2.
\end{aligned}$$

559 Thus, we see

$$\tilde{h} \times (\text{err}) = (\alpha - \beta) (\tilde{h} + 1) \|x^{(k+1)} - z^{(k)}\|^2 - (\beta + \gamma) \left( \frac{\tilde{h}+1}{\tilde{h}} \|x^{(k+1)} - x^{(k)}\|^2 + \|v^{(k+1)} - v^{(k)}\|^2 \right).$$

560 Here when we define  $z^{(k)} := x^{(k)}$ , (err) is nonpositive under the condition

$$(\alpha - \beta) (\tilde{h} + 1) - (\beta + \gamma) \frac{\tilde{h}+1}{\tilde{h}} \leq 0.$$

561 This condition reads as  $\tilde{h} \leq (\beta + \gamma)/(\alpha - \beta)$ , and the convergence rate is

$$\left( 1 + \sqrt{2(\beta + \gamma)} \right)^{-k} = \left( 1 + \tilde{h} \right)^{-k} \geq \left( 1 - \frac{\beta + \gamma}{\alpha + \gamma} \right)^k.$$

562 To obtain a better rate, we continue the computation of (err) without defining  $z^{(k)}$ . Let

$$\eta = \frac{1}{\frac{\tilde{h}+1}{\tilde{h}} + 1} = \frac{\tilde{h}}{2\tilde{h}+1},$$

563 and again by inserting the form of the method, and by using Lemma F.2,

$$\begin{aligned}
& \frac{\tilde{h}+1}{\tilde{h}} \|x^{(k+1)} - x^{(k)}\|^2 + \|v^{(k+1)} - v^{(k)}\|^2 \\
&= \frac{\tilde{h}+1}{\tilde{h}} \|x^{(k+1)} - x^{(k)}\|^2 + \left\| x^{(k+1)} + \frac{x^{(k+1)} - x^{(k)}}{\tilde{h}} - v^{(k)} \right\|^2 \\
&= \frac{\tilde{h}+1}{\tilde{h}} \|x^{(k+1)} - x^{(k)}\|^2 + \left( \frac{\tilde{h}+1}{\tilde{h}} \right)^2 \left\| x^{(k+1)} - \frac{\tilde{h}}{\tilde{h}+1} v^{(k)} - \frac{1}{\tilde{h}+1} x^{(k)} \right\|^2 \\
&= \frac{\tilde{h}+1}{\tilde{h}} \frac{1}{\eta} \left( \eta \|x^{(k+1)} - x^{(k)}\|^2 + (1 - \eta) \left\| x^{(k+1)} - \frac{\tilde{h}}{\tilde{h}+1} v^{(k)} - \frac{1}{\tilde{h}+1} x^{(k)} \right\|^2 \right) \\
&= \frac{\tilde{h}+1}{\tilde{h}} \frac{1}{\eta} \left( \left\| \eta (x^{(k+1)} - x^{(k)}) + (1 - \eta) \left( x^{(k+1)} - \frac{\tilde{h}}{\tilde{h}+1} v^{(k)} - \frac{1}{\tilde{h}+1} x^{(k)} \right) \right\|^2 \right. \\
&\quad \left. + \eta (1 - \eta) \left\| x^{(k+1)} - x^{(k)} - \left( x^{(k+1)} - \frac{\tilde{h}}{\tilde{h}+1} v^{(k)} - \frac{1}{\tilde{h}+1} x^{(k)} \right) \right\|^2 \right) \\
&= \frac{\tilde{h}+1}{\tilde{h}} \frac{2\tilde{h}+1}{\tilde{h}} \left[ \left\| x^{(k+1)} - \left( \frac{\tilde{h}+1}{2\tilde{h}+1} x^{(k)} + \frac{\tilde{h}}{2\tilde{h}+1} v^{(k)} \right) \right\|^2 + \frac{\tilde{h}}{2\tilde{h}+1} \frac{\tilde{h}+1}{2\tilde{h}+1} \left( \frac{\tilde{h}}{\tilde{h}+1} \right)^2 \|v^{(k)} - x^{(k)}\|^2 \right].
\end{aligned}$$

564 Hence we obtain

$$\begin{aligned} \tilde{h} \times (\text{err}) &= (\alpha - \beta) \left( \tilde{h} + 1 \right) \left\| x^{(k+1)} - z^{(k)} \right\|^2 - (\beta + \gamma) \frac{\tilde{h}}{2\tilde{h} + 1} \left\| v^{(k)} - x^{(k)} \right\|^2 \\ &\quad - (\beta + \gamma) \frac{\tilde{h} + 1}{\tilde{h}} \frac{2\tilde{h} + 1}{\tilde{h}} \left\| x^{(k+1)} - \frac{\tilde{h} + 1}{2\tilde{h} + 1} x^{(k)} - \frac{\tilde{h}}{2\tilde{h} + 1} v^{(k)} \right\|^2. \end{aligned}$$

565 If we set

$$z^{(k)} := \frac{\tilde{h} + 1}{2\tilde{h} + 1} x^{(k)} + \frac{\tilde{h}}{2\tilde{h} + 1} v^{(k)},$$

566 (err) is nonpositive under the condition

$$(\alpha - \beta) \left( \tilde{h} + 1 \right) - (\beta + \gamma) \frac{\tilde{h} + 1}{\tilde{h}} \frac{2\tilde{h} + 1}{\tilde{h}} \leq 0.$$

567 The definition of  $z^{(k)}$  is shown in the theorem. By solving the above inequality, we obtain the step  
568 size limitation

$$\tilde{h} \leq \frac{\sqrt{\beta + \gamma}}{\sqrt{\alpha + \gamma} - \sqrt{\beta + \gamma}},$$

569 which is shown in the theorem. ■

## 570 F Law of cosines and parallelogram identity

571 This section summarizes some useful lemmas used in the preceding sections.

572 In Hilbert spaces, especially in Euclidean spaces, the law of cosines holds:

$$\|y - x\|^2 = \|y\|^2 + \|x\|^2 - 2\langle y, x \rangle.$$

573 In this paper, we use this formula as an error-containing discrete chain rule of the squared norm.

574 **Lemma F.1.** For all  $x^{(k+1)}, x^{(k)} \in \mathbb{R}^d$ ,

$$\left\| x^{(k+1)} \right\|^2 - \left\| x^{(k)} \right\|^2 = 2\langle x^{(k+1)}, x^{(k+1)} - x^{(k)} \rangle - \left\| x^{(k+1)} - x^{(k)} \right\|^2$$

575 Another famous identity for the Hilbert norm (especially the Euclidean norm) is the parallelogram  
576 identity:

$$\left\| \frac{x + y}{2} \right\|^2 + \left\| \frac{x - y}{2} \right\|^2 = \frac{1}{2}(\|x\|^2 + \|y\|^2).$$

577 In this paper, we use a generalization of this identity. In the following lemma, we recover the  
578 parallelogram identity by setting  $\alpha = 1/2$ .

579 **Lemma F.2.** For all  $x, y \in \mathbb{R}^d$  and  $\alpha \in \mathbb{R}$ ,

$$\|\alpha x + (1 - \alpha)y\|^2 = \alpha\|x\|^2 + (1 - \alpha)\|y\|^2 - \alpha(1 - \alpha)\|x - y\|^2.$$

580 *Proof.* The claim is obtained by adding each side of the following equalities:

$$\begin{aligned} \|\alpha x + (1 - \alpha)y\|^2 &= \alpha^2\|x\|^2 + (1 - \alpha)^2\|y\|^2 + 2\alpha(1 - \alpha)\langle x, y \rangle, \\ \alpha(1 - \alpha)\|x - y\|^2 &= \alpha(1 - \alpha)\|x\|^2 + \alpha(1 - \alpha)\|y\|^2 - 2\alpha(1 - \alpha)\langle x, y \rangle. \end{aligned}$$

581 ■

## 582 G Proofs of theorems in Section 6

### 583 G.1 Proof of Theorem H.1

584 It is sufficient to show that

$$E(t) := f(x(t)) - f^*$$

585 satisfies  $\dot{E} \leq -2\mu E$ . Indeed,

$$\dot{E} = \langle \nabla f(x), \dot{x} \rangle = -\|\nabla f(x)\|^2 \leq -2\mu(f(x) - f^*) = -2\mu E$$

586 holds. Here, we used the chain rule, the continuous system itself, the PL condition, and the definition  
587 of  $E$  in this order. ■

588 **G.2 Proof of Theorem H.3**

589 By the PL condition, we observe that

$$\begin{aligned} -\|\bar{\nabla}f(y, x)\| &\leq -\sqrt{2\mu(f(x) - f^*)} + \|\nabla f(x)\| - \|\bar{\nabla}f(y, x)\| \\ &\leq -\sqrt{2\mu(f(x) - f^*)} + \|\nabla f(x) - \bar{\nabla}f(y, x)\|. \end{aligned}$$

590 Thus, the evaluation of  $\|\bar{\nabla}f(y, x) - \nabla f(x)\|$  yields  $\beta$ .

591 (i) From  $L$ -smoothness  $\alpha = L/2$  follows. By the definition  $\beta = 0$ .

592 (ii)  $L$ -smoothness yields  $\alpha = L/2$  and  $\beta = L$ . (Note that the convexity of  $f$  would imply  $\alpha = 0$ ,  
593 but it is not assumed now. If we adopt the other definition (18) then  $\beta = 0$ .)

594 (iii) By the same application of  $L$ -smoothness, we obtain  $\alpha = L/8$  and  $\beta = L/2$ .

595 (iv) Since the discrete chain rule exactly holds,  $\nabla_{\text{AVF}}f$  satisfies  $\alpha = 0$ . Then, by the  $L$ -smoothness  
596 of  $f$ ,

$$\begin{aligned} \|\nabla_{\text{AVF}}f(y, x) - \nabla f(x)\| &= \left\| \int_0^1 \nabla f(\tau y + (1 - \tau)x) d\tau - \nabla f(x) \right\| \\ &\leq \int_0^1 \|\nabla f(\tau y + (1 - \tau)x) - \nabla f(x)\| d\tau \\ &\leq \int_0^1 L\|\tau y + (1 - \tau)x - x\| d\tau \\ &\leq \int_0^1 L\tau\|y - x\| d\tau \\ &\leq \frac{L}{2}\|y - x\| \end{aligned}$$

597 holds, which implies  $\beta = L/2$ .

598 (v) Similar to the case (iv),  $\alpha = 0$  holds. By the  $L$ -smoothness of  $f$ ,

$$\begin{aligned} \|\nabla_{\text{G}}f(y, x) - \nabla f(x)\| &= \left\| \nabla f\left(\frac{y+x}{2}\right) - \frac{f(y) - f(x) - \langle \nabla f\left(\frac{y+x}{2}\right), y-x \rangle}{\|y-x\|^2} (y-x) - \nabla f(x) \right\| \\ &\leq \left\| \nabla f\left(\frac{y+x}{2}\right) - \nabla f(x) \right\| + \frac{|f(y) - f(x) - \langle \nabla f\left(\frac{y+x}{2}\right), y-x \rangle|}{\|y-x\|} \\ &\leq \frac{L}{2}\|y-x\| + \frac{L}{8}\|y-x\| \\ &= \frac{5L}{8}\|y-x\|, \end{aligned}$$

599 which implies  $\beta = 5L/8$ .

600 (vi) Similar to the previous cases,  $\alpha = 0$  holds. Using the same notation as in Appendix D (vi), we  
 601 obtain

$$\begin{aligned}
 \|\nabla_{\text{IA}} f(y, x) - \nabla f(x)\| &= \left\| \begin{bmatrix} \frac{f(y_1, x_2, x_3, \dots, x_d) - f(x_1, x_2, x_3, \dots, x_d)}{y_1 - x_1} \\ \frac{f(y_1, y_2, x_3, \dots, x_d) - f(y_1, x_2, x_3, \dots, x_d)}{y_2 - x_2} \\ \vdots \\ \frac{f(y_1, y_2, y_3, \dots, y_d) - f(y_1, y_2, y_3, \dots, x_d)}{y_d - x_d} \end{bmatrix} - \nabla f(x) \right\| \\
 &= \left\| \begin{bmatrix} \partial_1 f(\theta_1 y_1 + (1 - \theta_1)x_1, x_2, x_3, \dots, x_d) \\ \partial_2 f(y_1, \theta_2 y_2 + (1 - \theta_2)x_2, x_3, \dots, x_d) \\ \vdots \\ \partial_d f(y_1, y_2, y_3, \dots, \theta_d y_d + (1 - \theta_d)x_d) \end{bmatrix} - \nabla f(x) \right\| \\
 &= \sqrt{\sum_{k=1}^d |(\nabla f(\theta_k y_{1:k} x_{k+1:d} + (1 - \theta_k)y_{1:k-1} x_{k:d}))_k - (\nabla f(x))_k|^2} \\
 &\leq \sqrt{\sum_{k=1}^d L^2 \|y - x\|^2} \\
 &= \sqrt{d} L \|y - x\|,
 \end{aligned}$$

602 where  $\theta_k \in [0, 1]$  is a constant by the mean value theorem. Therefore,  $\beta = \sqrt{d}L$  holds.

603

### 604 G.3 Proof of Theorem H.5

605 Let

$$\tilde{E}^{(k)} := f(x^{(k)}) - f^*.$$

606 If  $\delta^+ \tilde{E}^{(k)} \leq -c \tilde{E}^{(k)}$  for  $c > 0$ , it can be concluded that  $E^{(k)} = (1 - ch)^{-k} \tilde{E}^{(k)}$  is nonincreasing  
 607 and hence  $f(x^{(k)}) - f^* \leq (1 - ch)^k E^{(0)}$ . Before starting the computation of  $\delta^+ \tilde{E}^{(k)}$ , we transform  
 608 the weak discrete PŁ condition (17) into a more convenient form. By substituting the scheme into  
 609 (17), we obtain

$$-\left\| \bar{\nabla} f(x^{(k+1)}, x^{(k)}) \right\|^2 \leq -\frac{\gamma}{(1 + \beta h)^2} (f(x^{(k)}) - f^*).$$

610 Thus, it follows from the weak discrete chain rule (16), the scheme, and the above inequality, that

$$\begin{aligned}
 \delta^+ \tilde{E}^{(k)} &= \delta^+ f(x^{(k)}) \\
 &\leq \left\langle \bar{\nabla} f(x^{(k+1)}, x^{(k)}), \delta^+ x^{(k)} \right\rangle + \alpha h \left\| \delta^+ x^{(k)} \right\|^2 \\
 &= -(1 - \alpha h) \left\| \bar{\nabla} f(x^{(k+1)}, x^{(k)}) \right\|^2 \\
 &\leq -(1 - \alpha h) \frac{\gamma}{(1 + \beta h)^2} (f(x^{(k)}) - f^*) \\
 &= -\gamma \frac{1 - \alpha h}{(1 + \beta h)^2} E^{(k)}.
 \end{aligned}$$

611 Hence if  $h \leq 1/\alpha$  we have the convergence. ■

## 612 H Extension to Polyak–Łojasiewicz type functions.

613 The weak discrete gradients can be useful also for non-convex functions. Here we illustrate it by  
 614 taking functions satisfying the Polyak–Łojasiewicz (PŁ) condition. A function  $f$  is said to satisfy  
 615 the PŁ condition if

$$-\|\nabla f(x)\|^2 \leq -2\mu(f(x) - f^*)$$



616 holds for any  $x \in \mathbb{R}^d$ . This was introduced as a sufficient condition for the steepest descent to  
 617 converge Polyak (1963). The set of functions satisfying the PL condition contains all differentiable  
 618 strongly convex functions and some nonconvex functions such as  $f(x) = x^2 + 3 \sin^2(x)$ .

619 **Theorem H.1** (Continuous systems). *Suppose that  $f$  satisfies the PL condition. Let  $x: [0, \infty) \rightarrow \mathbb{R}^d$   
 620 be the solution of the gradient flow (3). Then the solution satisfies*

$$f(x(t)) - f^* \leq e^{-\mu t} \|x_0 - x^*\|^2.$$

621 Let us define another weak discrete gradient for functions satisfying the PL condition. Recall that  
 622 the first condition of weak discrete gradients (Definition 4.1) has two meanings: the discrete chain  
 623 rule (9) and the discrete convex inequality (10). One could consider the PL condition instead of  
 624 convexity.

625 **Definition H.2.** A gradient approximation  $\bar{\nabla} f: \mathbb{R}^d \times \mathbb{R}^d \rightarrow \mathbb{R}^d$  is said to be *PL-type weak discrete*  
 626 *gradient of  $f$*  if there exists positive numbers  $\alpha, \beta$  such that for all  $x, y \in \mathbb{R}^d$  the following three  
 627 conditions hold:

$$\bar{\nabla} f(x, x) = \nabla f(x),$$

$$f(y) - f(x) \leq \langle \bar{\nabla} f(y, x), y - x \rangle + \alpha \|y - x\|^2, \quad (16)$$

$$-\|\bar{\nabla} f(y, x)\| \leq -\sqrt{2\mu(f(x) - f^*)} + \beta \|y - x\|. \quad (17)$$

628 **Theorem H.3.** *If  $f$  is  $L$ -smooth and satisfies the PL condition with the parameter  $\mu$ , the following  
 629 functions are PL-type weak discrete gradients:*

630 (i)  $\bar{\nabla} f(y, x) = \nabla f(x)$ ; then  $(\alpha, \beta) = (L/2, 0)$ .

631 (ii) If  $\bar{\nabla} f(y, x) = \nabla f(y)$ , then  $(\alpha, \beta) = (L/2, L)$ .

632 (iii) If  $\bar{\nabla} f(y, x) = \nabla f(\frac{x+y}{2})$ , then  $(\alpha, \beta) = (L/8, L/2)$ .

633 (iv) If  $\bar{\nabla} f(y, x) = \nabla_{\text{AVF}} f(y, x)$ , then  $(\alpha, \beta) = (0, L/2)$ .

634 (v) If  $\bar{\nabla} f(y, x) = \nabla_{\text{G}} f(y, x)$ , then  $(\alpha, \beta) = (0, 5L/8)$ .

635 (vi) If  $\bar{\nabla} f(y, x) = \nabla_{\text{IA}} f(y, x)$ , then  $(\alpha, \beta) = (0, \sqrt{d}L)$ .

636 **Remark H.4.** The parameters  $\alpha$  and  $\beta$  imply the magnitude of the discretization error. As the second  
 637 condition in Definition H.2, we can adopt instead

$$-\|\bar{\nabla} f(y, x)\| \leq -\sqrt{2\mu(f(y) - f^*)} + \beta \|y - x\|. \quad (18)$$

638 Then, we obtain better parameters for the implicit Euler method (ii).

639 The proof of Theorem H.3 is postponed in Appendix G.2.

640 **Theorem H.5** (Discrete systems). *Let  $\bar{\nabla} f$  be a PL-type weak discrete gradient of  $f$ . Let  $f$  be a  
 641 function which satisfies the necessary conditions that the PL-type weak DG requires. Let  $\{x^{(k)}\}$  be  
 642 the sequence given by (11). Then, under the step size condition  $h \leq 1/\alpha$ , the sequence satisfies*

$$f(x^{(k)}) - f^* \leq \left(1 - 2\mu h \frac{(1 - \alpha h)}{(1 + \beta h)^2}\right)^k (f(x_0) - f^*).$$

643 *In particular, the sequence satisfies*

$$f(x^{(k)}) - f^* \leq \left(1 - \frac{\mu}{2(\alpha + \beta)}\right)^k (f(x_0) - f^*),$$

644 *when the optimal step size  $h = 1/(2\alpha + \beta)$  is employed.*

## 645 I Some numerical examples

646 In this section, we give some numerical examples to complement the discussion in the main body  
 647 of this paper. Note that this is just to illustrate that we can actually easily construct new concrete

648 methods just by assuring the conditions of weak discrete gradients (weak DGs), and that the resulting  
 649 methods in fact achieve the prescribed rates; we here do not intend to explore a method that beats  
 650 known state-of-the-art methods. It is of course an ultimate goal of the unified framework project, but  
 651 is left as an important future work.

652 Below we consider some explicit optimization methods derived as special cases of the abstract weak  
 653 DG methods. Here we pick up simple two-dimensional problems so that we can observe not only  
 654 the decrease of the objective functions but also the trajectories of the points  $x$ 's for our intuitive  
 655 understandings.

656 First, we consider the case where the objective function is a  $L$ -smooth convex function. An explicit  
 657 weak discrete gradient method is then found as

$$\begin{cases} x^{(k+1)} - x^{(k)} = \frac{2k+1}{k^2} (v^{(k+1)} - x^{(k+1)}), \\ v^{(k+1)} - v^{(k)} = -\frac{2k+1}{4} h^2 \nabla f(z^{(k)}), \\ z^{(k)} - x^{(k)} = \frac{2k+1}{(k+1)^2} (v^{(k)} - x^{(k)}). \end{cases} \quad (19)$$

658 We call this method (wDG-c). This is the simplest example of the abstract method in Theorem 5.4,  
 659 where we choose  $A_k = (kh)^2$  and  $\bar{\nabla} f(y, x) = \nabla f(x)$ . The authors believe this method itself has  
 660 not been explicitly pointed out in the literature, and is new. The expected rate is the one predicted in  
 661 the theorem,  $O(1/k^2)$ , under the step size condition  $h \leq 1/\sqrt{L}$  (recall that  $\alpha$  for the weak DG is  
 662  $L/2$  as shown in Theorem 4.2). For comparison, we pick up Nesterov's accelerated gradient method  
 663 for convex functions

$$\begin{cases} y^{(k+1)} = x^{(k)} - h^2 \nabla f(x^{(k)}), \\ x^{(k+1)} = y^{(k+1)} + \frac{k}{k+3} (y^{(k+1)} - y^{(k)}). \end{cases} \quad (20)$$

664 We denote this method by (NAG-c). It is well-known that it achieves the same rate, under the same  
 665 step size condition; we summarize these information in Table 3.

666 As an objective function, we employ

$$f(x) = 0.1x_1^4 + 0.001x_2^4, \quad (21)$$

667 which is not strongly convex. (Strictly speaking, this is not  $L$ -smooth as well, but we consider in the  
 668 following way: for each initial  $x$  we obtain the level set  $\{x \mid f(x) = f(x^{(0)})\}$ . Then we consider the  
 669 function (21) inside the region, and extend the function outside it appropriately; for example such  
 670 that the function grows linearly as  $\|x\| \rightarrow \infty$ .)

671 Numerical results are shown in Figure 1. The top-left panel of the figure shows the convergence  
 672 of the objective function  $f(x)$  when the optimal step size  $1/\sqrt{L}$  is chosen. We see both methods  
 673 achieve the predicted rate  $O(1/k^2)$  (mind the dotted guide line). We also see that under this setting,  
 674 (wDG-c) converges faster than (NAG-c). This suggests that the new framework can give rise to  
 675 an optimization method that is competitive to state-of-the-art methods (as said before, we do not  
 676 say anything conclusive on this point; in order to discuss practical performance, we further need to  
 677 discuss other implementation issues such as stepping schemes.) The trajectories of  $x^{(k)}$ 's are almost  
 678 the same, for all the tested step sizes.

679 Next, we consider methods for strongly-convex functions. We use the following explicit weak DG  
 680 method:

$$\begin{cases} x^{(k+1)} - x^{(k)} = \sqrt{\mu}h (v^{(k+1)} - x^{(k+1)}), \\ v^{(k+1)} - v^{(k)} = \sqrt{\mu}h \left( z^{(k)} - v^{(k+1)} - \frac{\nabla f(z^{(k)})}{\mu} \right), \\ z^{(k)} - x^{(k)} = \sqrt{\mu}h (x^{(k)} + v^{(k)} - 2z^{(k)}). \end{cases} \quad (22)$$

681 We call this (wDG-sc). This can be obtained by setting  $\bar{\nabla} f(y, x) = \nabla f(x)$  in Theorem 5.5.  
 682 Since for this choice we have  $\alpha = L/2$  and  $\beta = \mu/2$  (Theorem 4.2), the step size condition is

Table 3: Step size limitations and convergence rates of the methods used in the experiments

| scheme       | step size limitation        | convergence rate                                        |
|--------------|-----------------------------|---------------------------------------------------------|
| NAG-c (20)   | $1/\sqrt{L}$                | $O\left(\frac{1}{k^2}\right)$                           |
| wDG-c (19)   | $1/\sqrt{L}$                | $O\left(\frac{1}{k^2}\right)$                           |
| NAG-sc (23)  | $1/\sqrt{L}$                | $O\left(\left(1 - \sqrt{\frac{\mu}{L}}\right)^k\right)$ |
| wDG-sc (22)  | $1/(\sqrt{L} - \sqrt{\mu})$ | $O\left(\left(1 - \sqrt{\frac{\mu}{L}}\right)^k\right)$ |
| wDG2-sc (24) | $\sqrt{\mu}/(L - \mu)$      | $O\left(\left(1 - \frac{\mu}{L}\right)^k\right)$        |

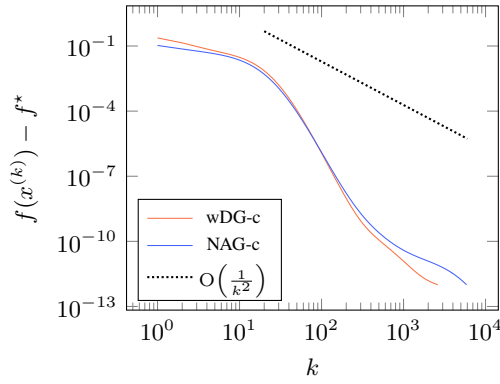

(a) Evolution of function values ( $h = 1/\sqrt{L}$ ).

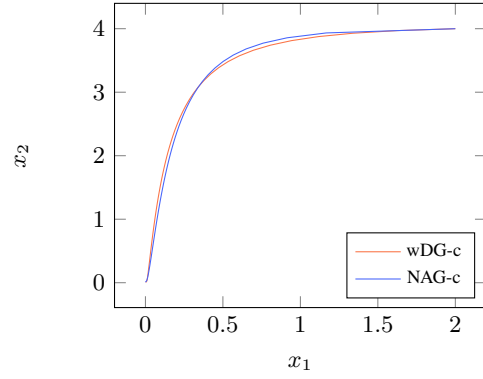

(b) Trajectory ( $h = 1/\sqrt{L}$ ).

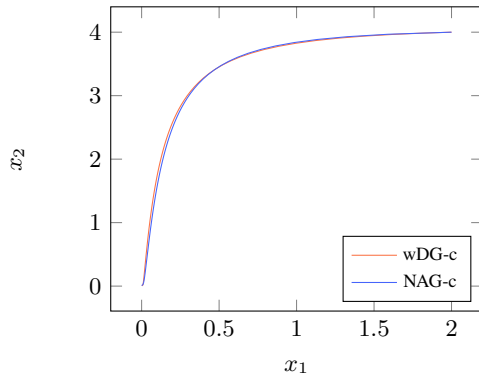

(c) Trajectory ( $h = 0.7/\sqrt{L}$ ).

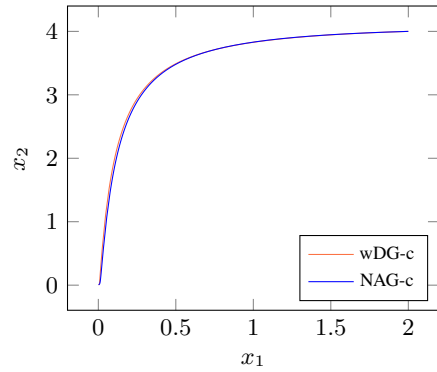

(d) Trajectory ( $h = 0.4/\sqrt{L}$ ).

Figure 1: Trajectories and function values by (wDG-c) and (NAG-c). The objective function is (21) and the initial solution is (2, 4).

683  $h \leq 1/(\sqrt{L} - \sqrt{\mu})$ , and the predicted rate is  $O\left((1 - \sqrt{\mu/L})^k\right)$  (which is attained by the largest  
 684  $h = 1/(\sqrt{L} - \sqrt{\mu})$ ).

685 As before, we compare this method with Nesterov's accelerated gradient method for strongly convex  
 686 functions (NAG-sc):

$$\begin{cases} y^{(k+1)} = x^{(k)} - h^2 \nabla f(x^{(k)}), \\ x^{(k+1)} = y^{(k+1)} + \frac{1 - \sqrt{\mu}h}{1 + \sqrt{\mu}h} (y^{(k+1)} - y^{(k)}). \end{cases} \quad (23)$$

687 Here, in addition to these, we also consider a simpler method, where  $z^{(k)} = x^{(k)}$  is chosen to find

$$\begin{cases} x^{(k+1)} - x^{(k)} = \sqrt{\mu}h (v^{(k+1)} - x^{(k+1)}), \\ v^{(k+1)} - v^{(k)} = \sqrt{\mu}h \left( x^{(k)} - v^{(k+1)} - \frac{\nabla f(x^{(k)})}{\mu} \right). \end{cases} \quad (24)$$

688 We call this (wDG2-sc). This method is more natural as a numerical method for the accelerated  
 689 gradient flow (6), compared to the methods above, and we expect it illustrates how “being natural as  
 690 a numerical method” affects the performance. The rate and the step size limitation were revealed in  
 691 the proof of Theorem 5.5 (Appendix E).

692 We summarized the step size limitations and rates in Table 3. Notice that the predicted rate of  
 693 (wDG-sc) is better than that of (wDG2-sc).

694 The objective function is taken to be the quadratic function

$$f(x) = 0.001(x_1 - x_2)^2 + 0.1(x_1 + x_2)^2 + 0.01x_1 + 0.02x_2, \quad (25)$$

695 and results are shown in Figure 2. Again the top-left panel shows the convergence of the objective  
 696 function. We see that (wDG-sc) and (NAG-sc) with each optimal step size show almost the same  
 697 convergence, which is in this case much better than the predicted worst case rate (the dotted guide  
 698 line). (wDG2-sc) slightly falls behind the other two, but it eventually achieves almost the same  
 699 performance as  $k \rightarrow \infty$ . The trajectories of the points  $x^{(k)}$ 's are, however, quite different among the  
 700 three methods, which is interesting to observe. The trajectory of (wDG2-sc) seems to suffer from  
 701 wild oscillations, while (wDG-sc) generates milder trajectory. (NAG-sc) comes between these two.  
 702 We need careful discussion to conclude which dynamics is the best as an optimization method, but if  
 703 we consider such oscillations are not desirable (possibly causing some instability), it might suggest  
 704 that (wDG-sc) is the first choice for this problem. In any case, in this way we can explore various  
 705 concrete optimization method within the framework of the weak DG by varying the weak DG, which  
 706 is exactly the main claim of this paper.

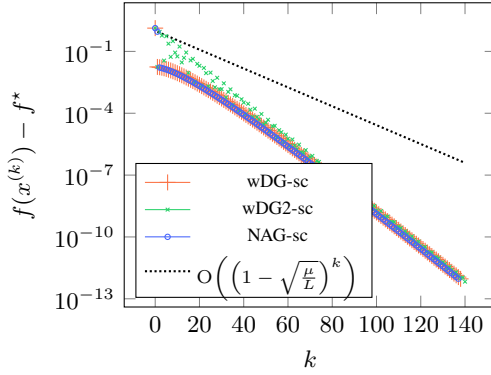

(a) Evolution of function values

( $h = 1/(\sqrt{L} - \sqrt{\mu})$  for wDG-sc and wDG2-sc, and  $h = 1/\sqrt{L}$  for NAG-sc).

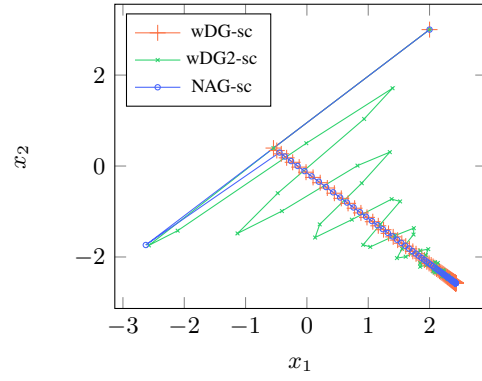

(b) Trajectory ( $h = 1/(\sqrt{L} - \sqrt{\mu})$  for wDG-sc and wDG2-sc, and  $h = 1/\sqrt{L}$  for NAG-sc).

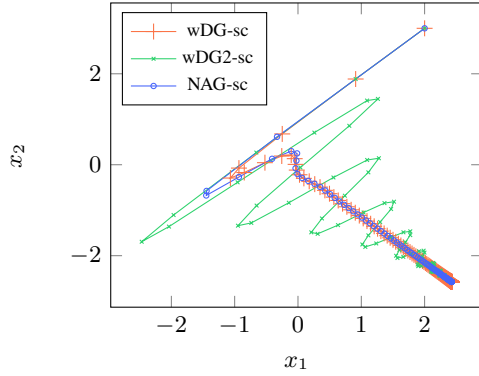

(c) Trajectory ( $h = 0.7/\sqrt{L}$ )

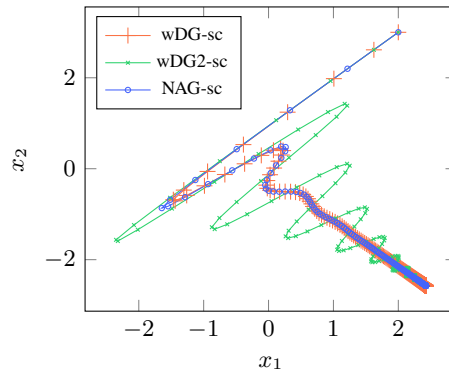

(d) Trajectory ( $h = 0.4/\sqrt{L}$ )

Figure 2: Trajectories and function values by (wDG-sc), (wDG2-sc) and (NAG-sc). The objective function is (25) and the initial value is  $(2, 3)$ .
